# Supplementary material for: Glycine, serine and threonine metabolism confounds efficacy of complement-mediated killing
Source: PubMed Central journal article supplement (PMC6658569; doi:10.1038/s41467-019-11129-5), 2019-07-25
Supplement: 41467_2019_11129_MOESM1_ESM.pdf [file 41467_2019_11129_MOESM1_ESM.pdf]

1  
2  
3  
4  
5  
6  
7  
8

**Glycine, serine and threonine metabolism confounds efficacy of  
complement-mediated killing**

Cheng, et al.,

9 **Supplementary Figures**

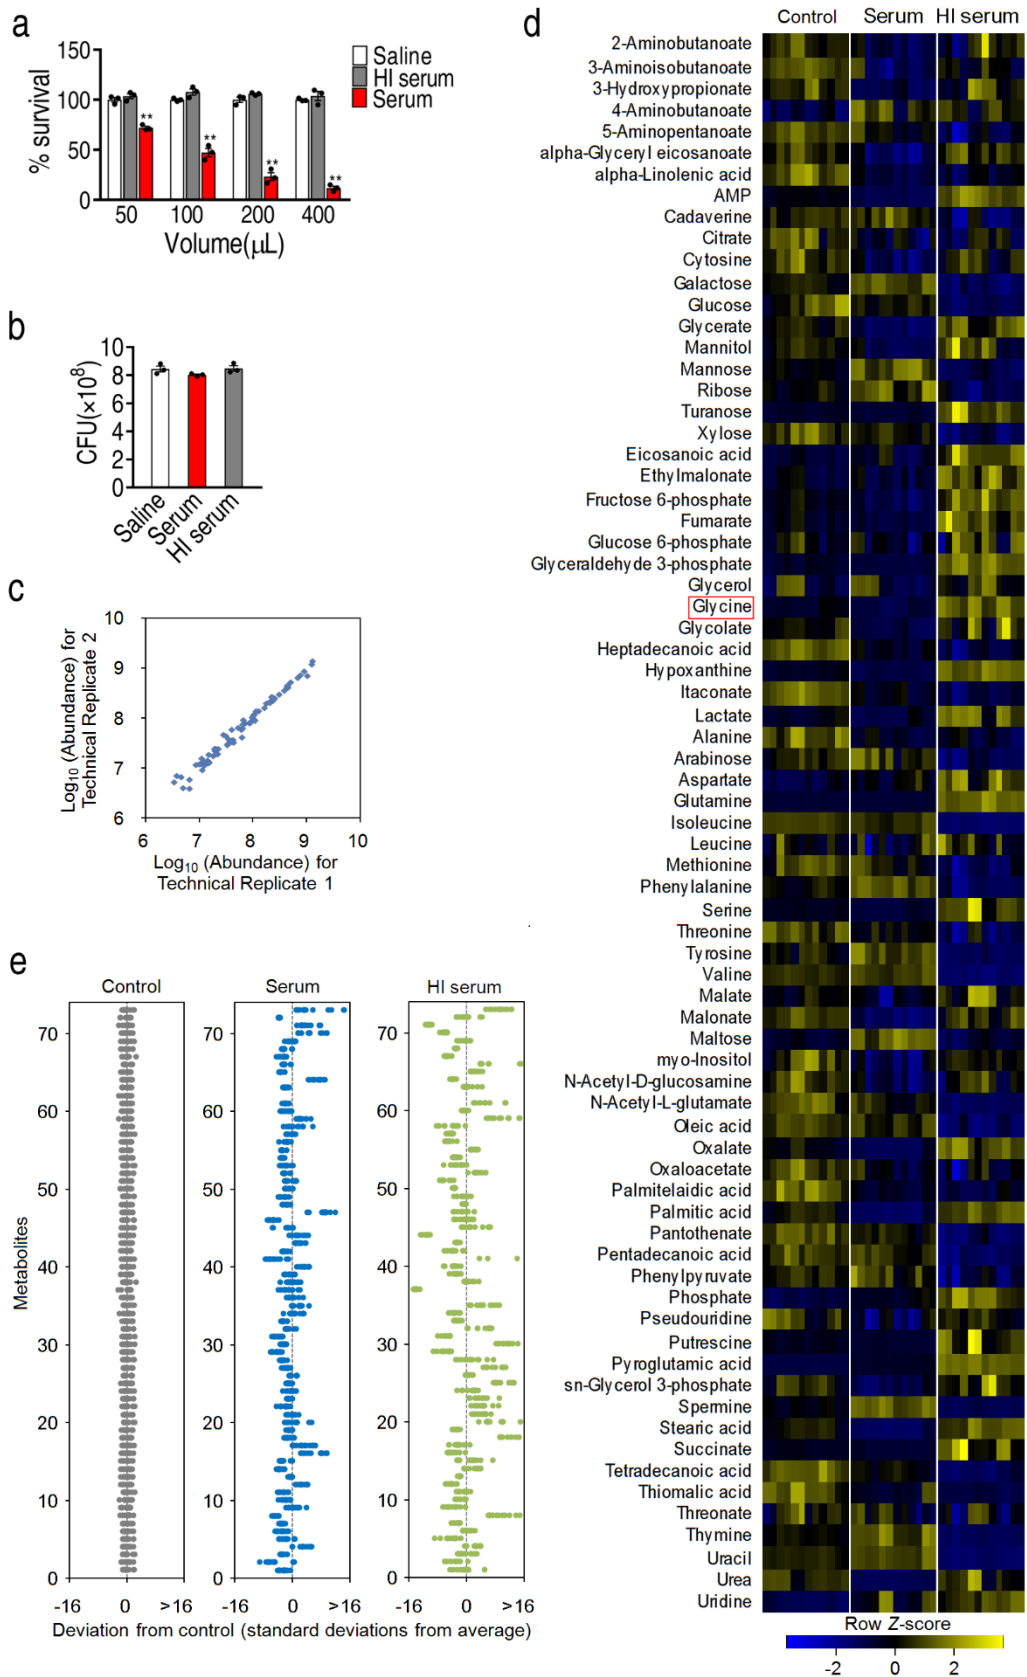

10

11 **Supplementary Fig. 1 Metabolomic profile for serum-survival bacteria.** a, Percent  
12 survival of *E. coli* K12 cells exposed to the indicated serum or HI serum at 37 °C for

13 2-h ( $n = 3$ ). **b**, Bacterial number in 1 mL with 1.0 of OD600 by plate counting. K12  
14 cells were exposed to serum, HI serum or saline. The cells were collected and washed  
15 twice using a saline buffer by centrifugation at 8,000 g, 5 min at 4 °C. The resulting  
16 cells were adjusted to 1.0 of OD600 and washed four times as above. Pellets were  
17 diluted for plate counting ( $n = 3$ ). **c**, Reproducibility of metabolomic profiling  
18 platform used in the discovery phase. Metabolite abundances quantified in six  
19 independent biological repeats with two technical replicates were shown. Spearman  
20 correlation coefficient between technical replicates varied between 0.991 and 0.996. **d**,  
21 Heat map showing the metabolites. Yellow and blue indicated an increase and a  
22 decrease of metabolites relative to the median metabolite level, respectively (see color  
23 scale). Glycine was highlighted in the red box ( $n = 6$ ). **e**, Z-score plot for data from  
24 serum-treated samples compared to the mean and standard deviation of the control  
25 samples with a Z-score range of -9.1 to 35.2. 59 out of the 73 metabolites (80.8%)  
26 were significant differential (Wilcoxon  $p < 0.05$ ), corresponding to false discovery  
27 rate (FDR) of 9.1%. Of the 59 differential metabolites, 44 decreased and 15 increased.  
28 The Z-score plot for data from HI serum-treated cells compared to the mean and  
29 standard deviation of the control samples with a Z-score range of -14.7 to 168.9. Out  
30 of the 73 metabolites (75.3%), 55 were significantly different in abundance (Wilcoxon  
31  $P < 0.05$ ), corresponding to a false discovery rate (FDR) of 4.47%. Of the 55  
32 differential metabolites, 32 decreased and 23 increased. Results (**a** and **b**) are  
33 displayed as mean  $\pm$  SEM, and significant differences are identified (\*\* $p < 0.01$ ) as  
34 determined by two-tailed Student's  $t$  test.

35  
36 To identify the metabolic signature in response to serum, non-pathogenic *E. coli* K12  
37 was treated with serum, whose percent survival was decreased with the increased  
38 serum concentration, but not in heat-inactivated (HI) serum (**Supplementary Fig. 1a**).  
39 A similar number of bacteria was present in serum-survival, HI serum-survival and  
40 control (without serum) groups when they were in the same OD (**Supplementary Fig.**  
41 **1b**). To perform metabolome profiling, six biologically equivalent samples and two  
42 technical replicas were prepared for each group, yielding a total of 36 data sets and  
43 the abundance of all metabolites was determined and compared. The reproducibility  
44 of the GC-MS data is shown in (**Supplementary Fig. 1c**). A total of 73 metabolites  
45 were identified by GC-MS in each of the three groups. Hierarchical clustering for the  
46 complete data set is shown in (**Supplementary Fig. 1d**). The statistical significance  
47 of differential metabolite abundance in the presence *vs.* the absence of serum is  
48 presented as Z-score (**Supplementary Fig. 1e**).

49

50

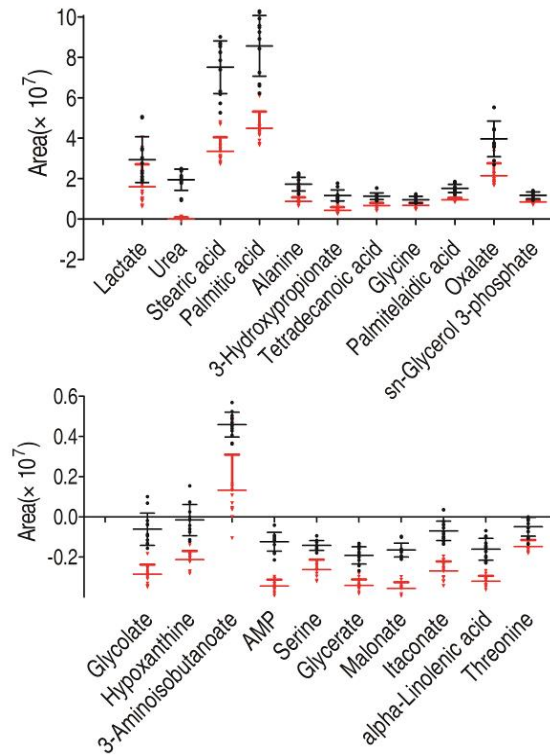

51

52 **Supplementary Fig. 2 Decreased abundance of metabolites.** The data were median  
 53 centered and inter-quartile range (IQR) scaled per sample in serum-treated samples  
 54 (red) compared with control (black) from data (**Fig. 1e**) ( $n = 6$ ). Results are displayed  
 55 as mean  $\pm$  SEM, and significant differences are identified (\*\* $p < 0.01$ ) as determined  
 56 by two-tailed Student's  $t$  test.

57

58

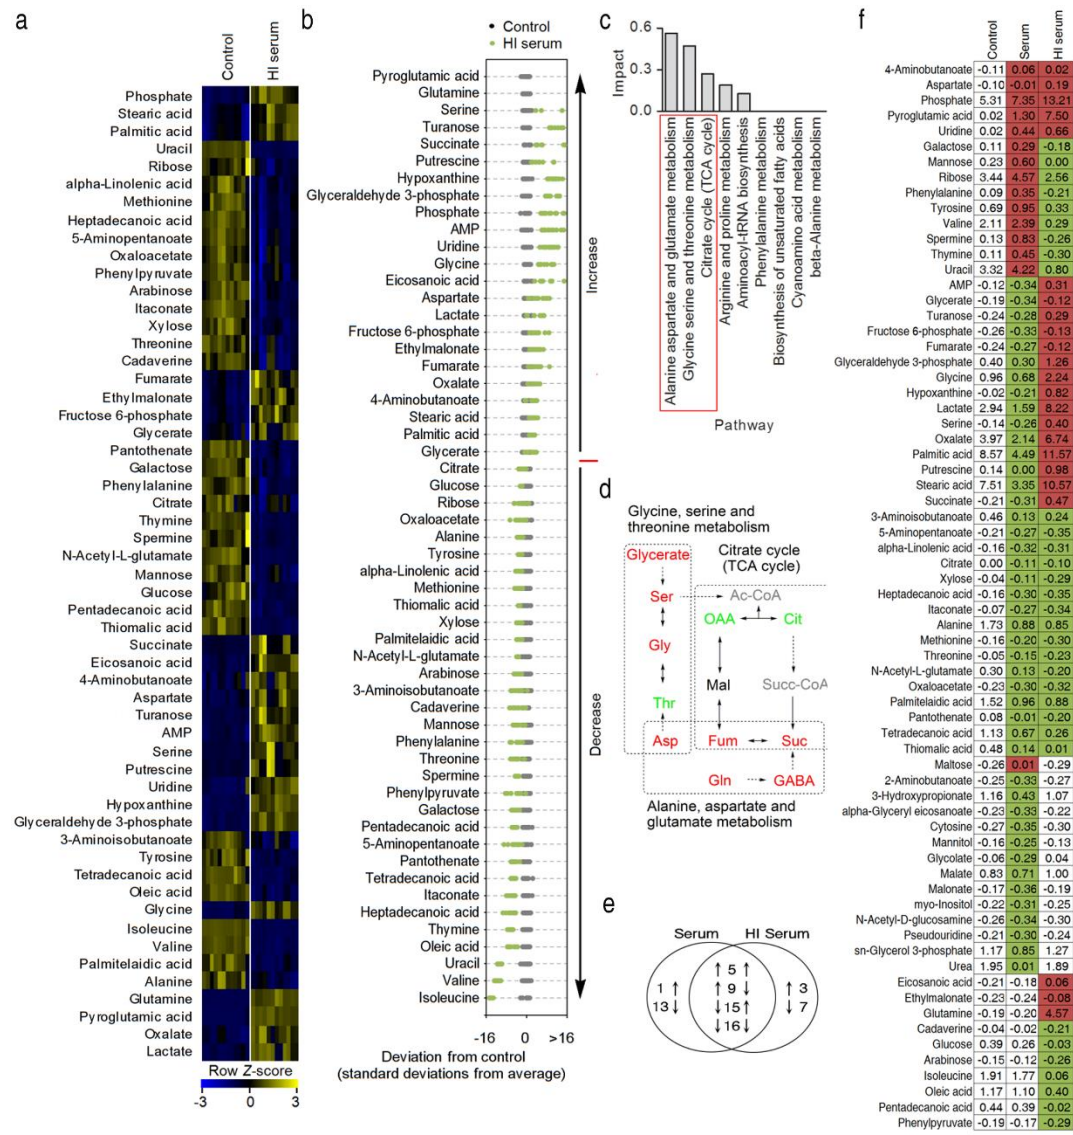

59

60 **Supplementary Fig. 3 Metabolomic profile for HI serum.** **a**, Heat map showing  
 61 relative abundance of 55 significantly differential metabolites in *E. coli* K12 in the  
 62 absence (left) and presence (right) of HI serum as indicated. Heat map scale (blue to  
 63 yellow; low to high abundance) is shown below data ( $n = 6$ ). **b**, Z-scores (standard  
 64 deviation from average) corresponding to data in (a). **c**, Pathway enrichment analysis  
 65 of significantly differential metabolites. Red box highlights putative pathway  
 66 biomarkers. **d**, Pathway regulation analysis of putative pathway biomarkers. Change  
 67 in metabolite abundance is indicated as follows: black, no change; red, up-regulation;  
 68 green, down-regulation; gray, not detected. Thr, threonine; Gly, glycine; Ser, serine;  
 69 Ac-CoA, acetyl-CoA; Cit, citrate; SuccCoA, succinyl-CoA; Suc, succinate; Fum,  
 70 fumarate; Mal, malate; OAA, oxaloacetate; Asp, aspartate; Gln, glutamine; GABA,  
 71 4-aminobutanoate. **e**, Venn diagram showing the overlapping of differential  
 72 metabolites between serum and HI serum. Increased and decreased metabolites are  
 73 indicated in an arrow. **f**, Integrative analysis of these metabolites from data (e). Red  
 74 and green indicate up-regulation and down-regulation of metabolites, respectively.  
 75 The number shows the normalized abundance of differential metabolites.

76

77

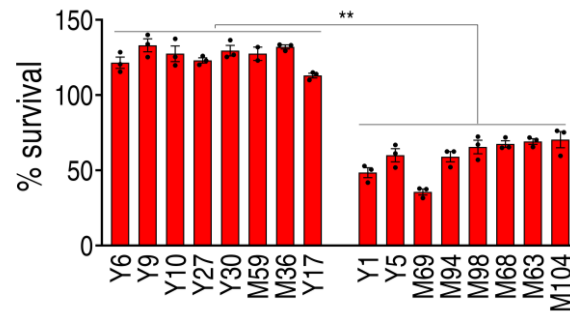

78

79 **Supplementary Fig. 4 Identification of serum-resistant and -susceptible *E. coli*.**

80 Percent survival of sixteen clinically isolated pathogenic *E. coli* strains in the presence

81 of 100 µL serum. Left, serum-resistant strains, right, serum-susceptible strains ( $n = 3$ ).

82 Results are displayed as mean  $\pm$  SEM, and significant differences are identified (\*\* $p$

83  $< 0.01$ ) as determined by two tailed Student's  $t$  test.

84

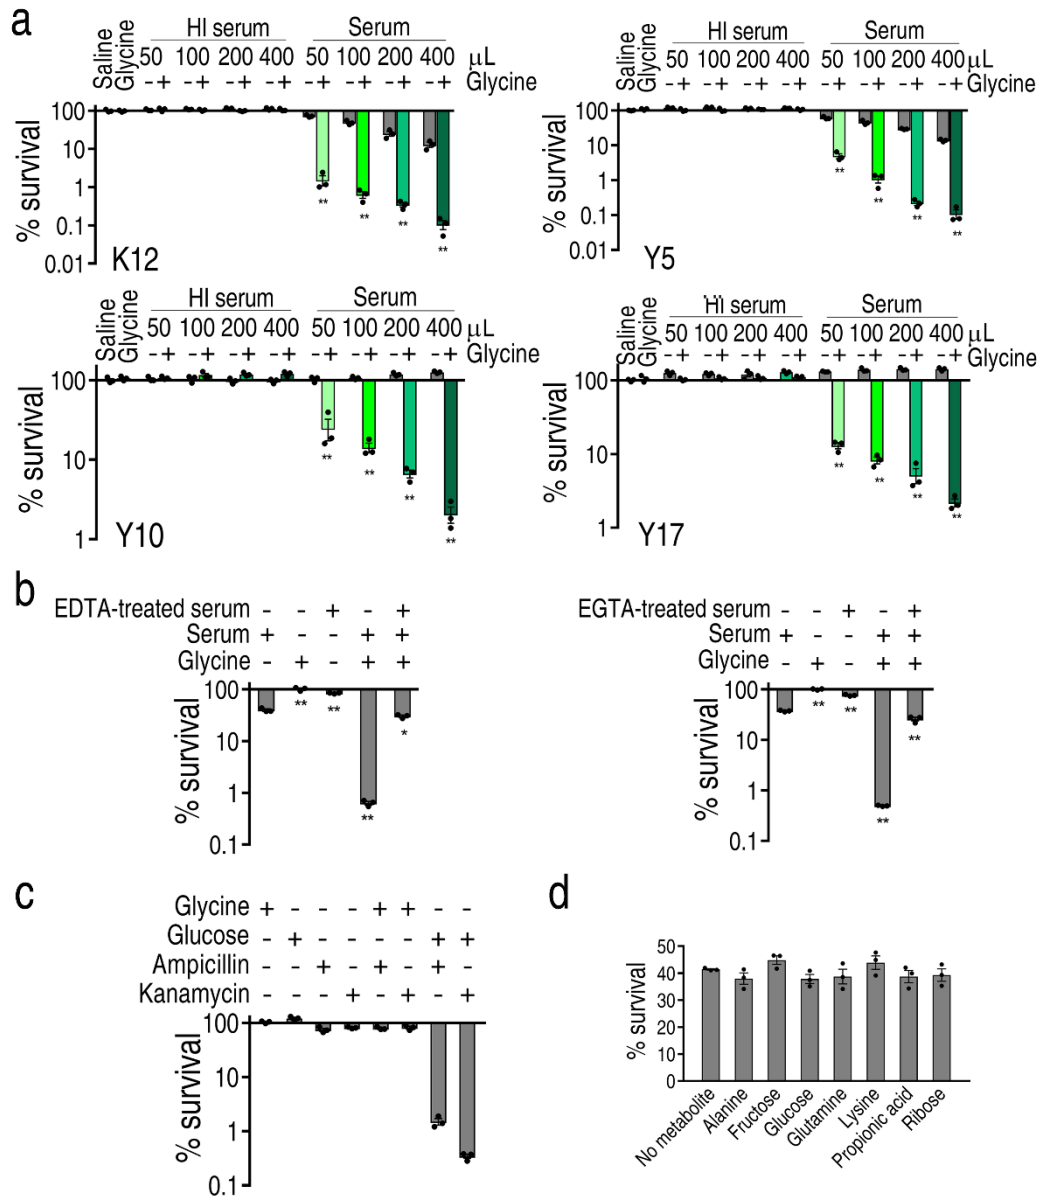

85

86 **Supplementary Fig. 5 Glycine-enabled killing by serum.** **a**, Percent survival of *E.*  
 87 *coli* K12, Y5, Y10 and Y17 in the presence or absence of the indicated volume of  
 88 serum or HI serum plus 100 mM glycine ( $n = 3$ ). **b**, Percent survival of *E. coli* K12  
 89 incubated in 100  $\mu$ L serum, or EDTA-, or EGTA-treated serum in the presence or  
 90 absence of 100 mM glycine ( $n = 3$ ). **c**, Percent survival of *E. coli* K12 incubated in  
 91 saline solution and in the indicated metabolites (100 mM glycine or 10 mM glucose)  
 92 or/and antibiotics (40  $\mu$ g ampicillin or 2.5  $\mu$ g gentamicin) for 2 h ( $n = 3$ ). **d**, Percent  
 93 survival of *E. coli* K12 in the presence or absence of the indicated metabolites plus  
 94 100  $\mu$ L serum ( $n = 3$ ). Results (**a-d**) are displayed as mean  $\pm$  SEM, and significant  
 95 differences are identified (\* $p < 0.05$ ; \*\* $p < 0.01$ ) as determined by two-tailed  
 96 Student's *t* test.

97

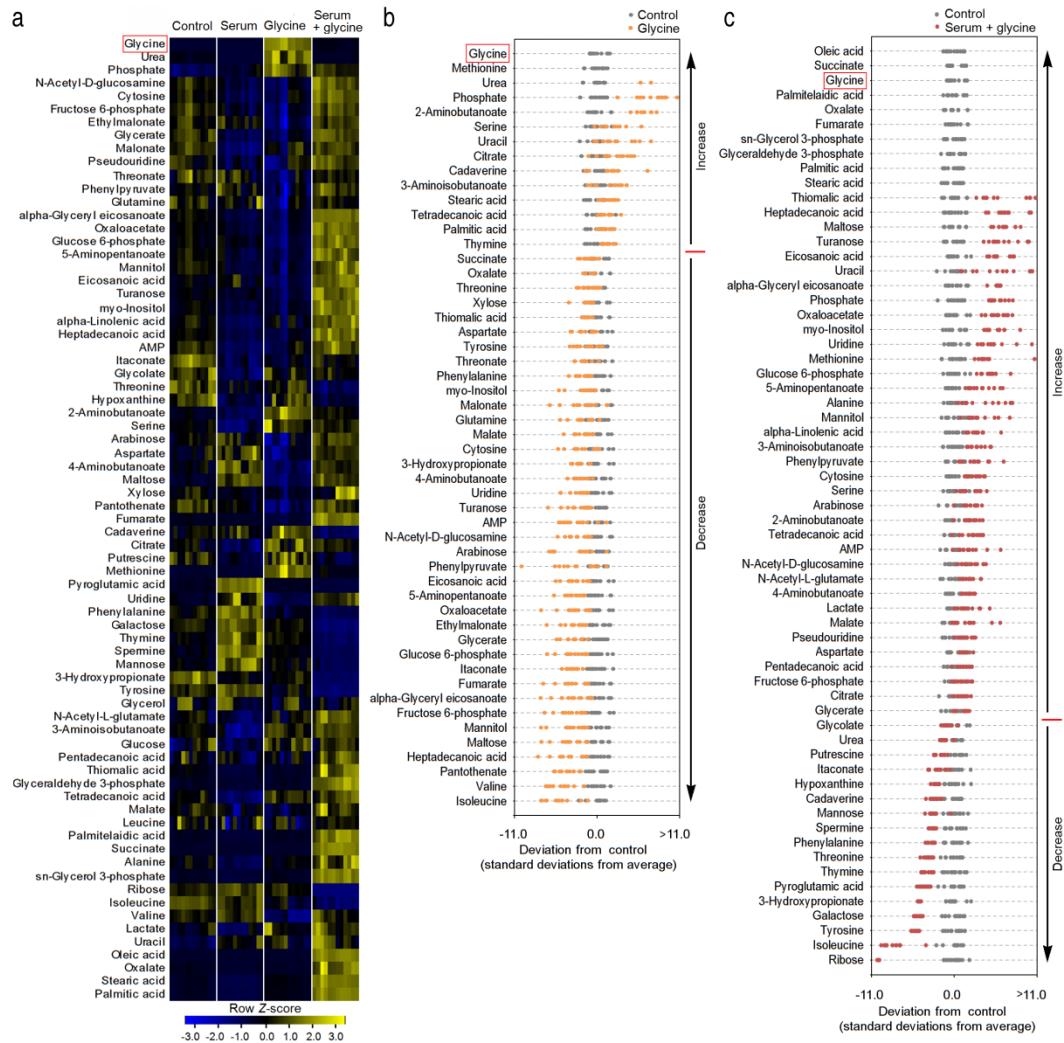

98

99

**Supplementary Fig. 6 Metabolomic profile for glycine and serum plus glycine. a,**

100

Heat map representation of unsupervised hierarchical clustering for metabolites in

101

control, serum, glycine, and serum plus glycine. 73 metabolites in cells were

102

measured across the four groups with 6 independent biological repeats. Yellow and

103

blue indicate an increase and decrease of metabolites relative to the median metabolite

104

level, respectively (see color scale) ( $n = 6$ ). **b, c**, Z-score plots for the data in treatment

105

groups compared to the mean and standard deviation of the control sample. Further

106

use of Z-scores visualized the change of these metabolites. Significant changes took

107

place in glycine and serum + glycine, relative to the control. Compared with the

108

control, 52 out of the 73 metabolites (71.2%) were significantly differential in glycine,

109

corresponding to false discovery rate (FDR) of 13.0%, in which 14 upregulation and

110

38 downregulation were detected (**b**). Data showed changes in the Z-scores, which

111

111 ranged from -10.1 to 622.5 in glycine and from -10.3 to 174.1 in serum + glycine. 63

112

112 out of 73 metabolites (86.3%) showed a significant difference in serum + glycine,

113

113 corresponding to FDR of 4.5%, in which 46 upregulation and 17 downregulation were

114

114 detected (**c**). Comparison between control and serum is described in **Fig. 1a-e** and

115

**Supplementary Fig. 1c-d**.

116

117

Six independent biological replicates with two technical replicates were made for



118 each group. Unsupervised hierarchical clustering of the high and low abundance  
119 metabolites among the four groups is shown in (**Supplementary Fig. 6**). The critical  
120 metabolites were identified by ICA and Kruskal-Wallis' analysis (**Supplementary**  
121 **Figs. 7a** and **7b**). Pathway analysis enriched the same first impactful three pathways  
122 in the glycine group and serum plus glycine group (**Supplementary Fig. 7c**), which is  
123 the same as (**Fig. 1c**).  
124

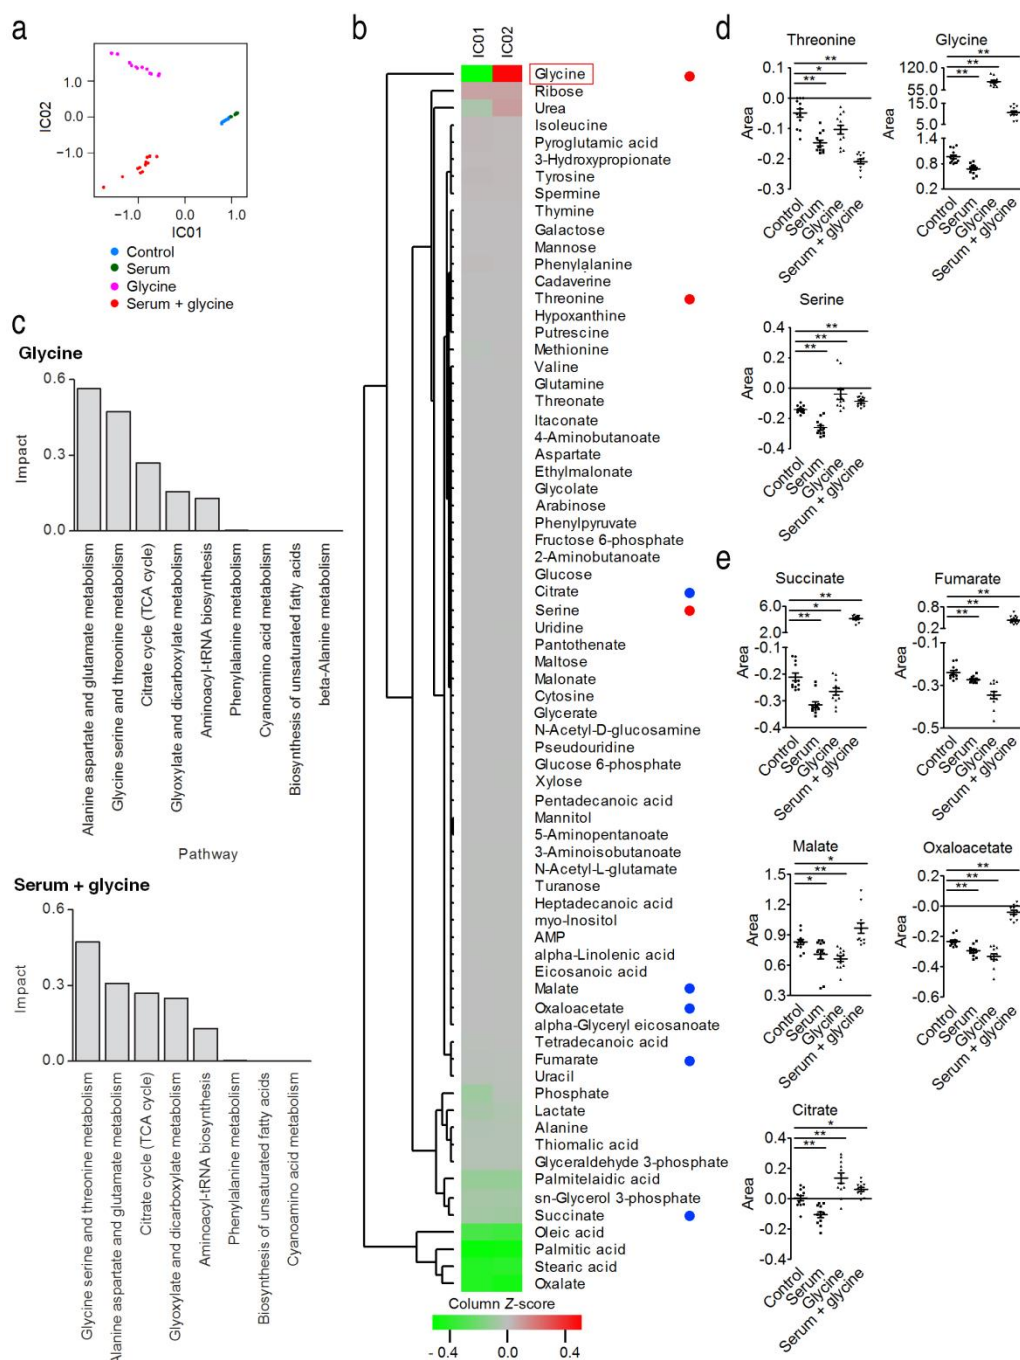

126

127 **Supplementary Fig. 7 Pathway enrichment analysis and ICA. a,**

128 independent component analysis (ICA) directly captures metabolite variation in four groups,

129 according to the treatments set and the classes of data. Each dot in the plot represents

130 the replicate analysis of cell samples. IC01 and IC02 used in this plot explain 98.34%

131 of the total variance which allows confident interpretation of the variation. Positive

132 IC01 differentiated serum from control and negative IC01 differentiated control from

133 glycine and serum plus glycine. IC02 distinguished glycine from serum plus glycine.

134 **b,** Hierarchical clustering of 71 differential metabolites (multiple comparisons,135 Kruskal-Wallis,  $P < 0.05$ ) identified by their weight in different independent

136 components. Red and blue circles indicate the core metabolites in the pathway of

137 glycine, serine and threonine metabolism and TCA cycle, respectively. Red box  
138 highlights the biomarker ( $n = 6$ ). **c**, Pathway enrichment analysis of significantly  
139 differential metabolites. **d, e**, Scatter plot of eight core metabolites in the pathway of  
140 glycine, serine and threonine metabolism (**d**) and the TCA cycle (**e**) ( $n = 6$ ). Results (**d**  
141 and **e**) are displayed as mean  $\pm$  SEM, and significant differences are identified (\*  $p <$   
142 0.05; \*\*  $p < 0.01$ ) as determined by Wilcoxon test.

143

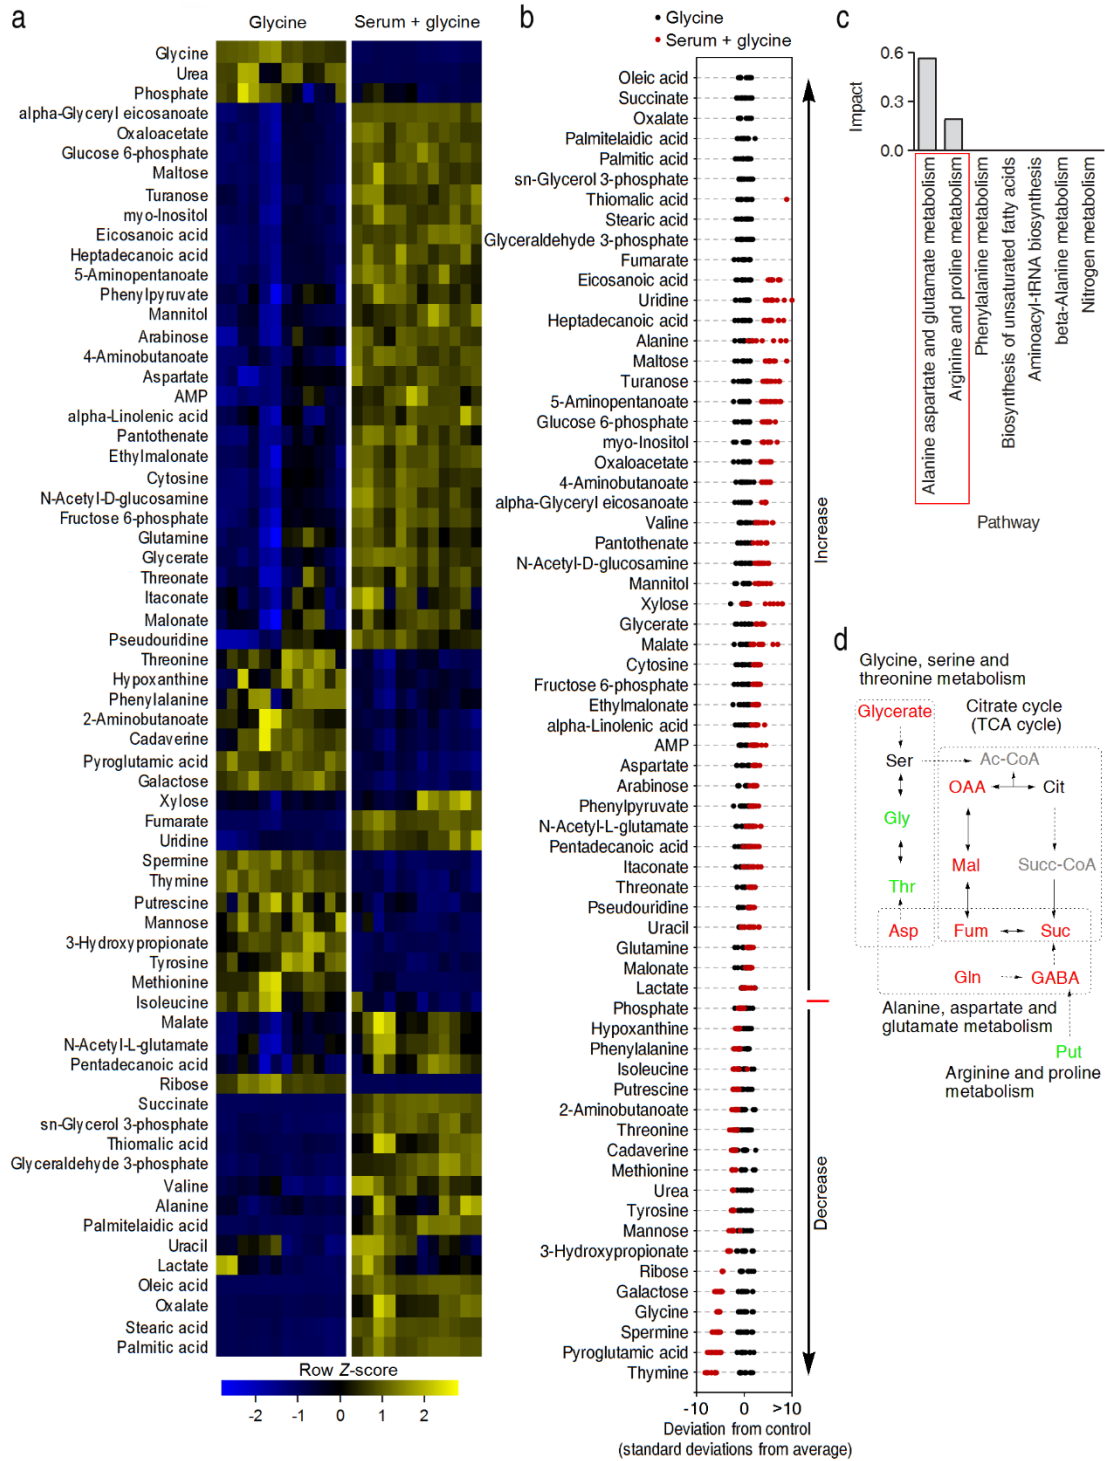

144

145 **Supplementary Fig. 8 Differential metabolomic profiling. a**, Heat map showing the  
 146 differential metabolites. Yellow and blue indicate an increase and decrease of  
 147 metabolites relative to the median metabolite level, respectively (see color scale) ( $n =$   
 148 6). **b**, Z-score plot for data in serum plus glycine-treated samples compared to the  
 149 mean and standard deviation of glycine-treated samples with a Z-score range of -8.2  
 150 to 118.3. 65 out of the 73 metabolites (89.0%) were significant differential (Wilcoxon  
 151  $P < 0.05$ ), corresponding to false discovery rate of 0.8%. **c**, Pathway enrichment  
 152 analysis of significantly differential metabolites. Red box highlights putative pathway

153 biomarkers. **d**, Pathway regulation analysis of putative pathway biomarkers. Change  
154 in metabolite abundance is indicated as follows: black, no change; red, up-regulation;  
155 green, down-regulation; gray, not detected. Thr, threonine; Gly, glycine; Ser, serine;  
156 Ac-CoA, acetyl-CoA; Cit, citrate; SuccCoA, succinyl-CoA; Suc, succinate; Fum,  
157 fumarate; Mal, malate; OAA, oxaloacetate; Asp, aspartate; Gln, glutamine; GABA,  
158 4-aminobutanoate; Put, putrescine.

159

160

161

162

163

164

165

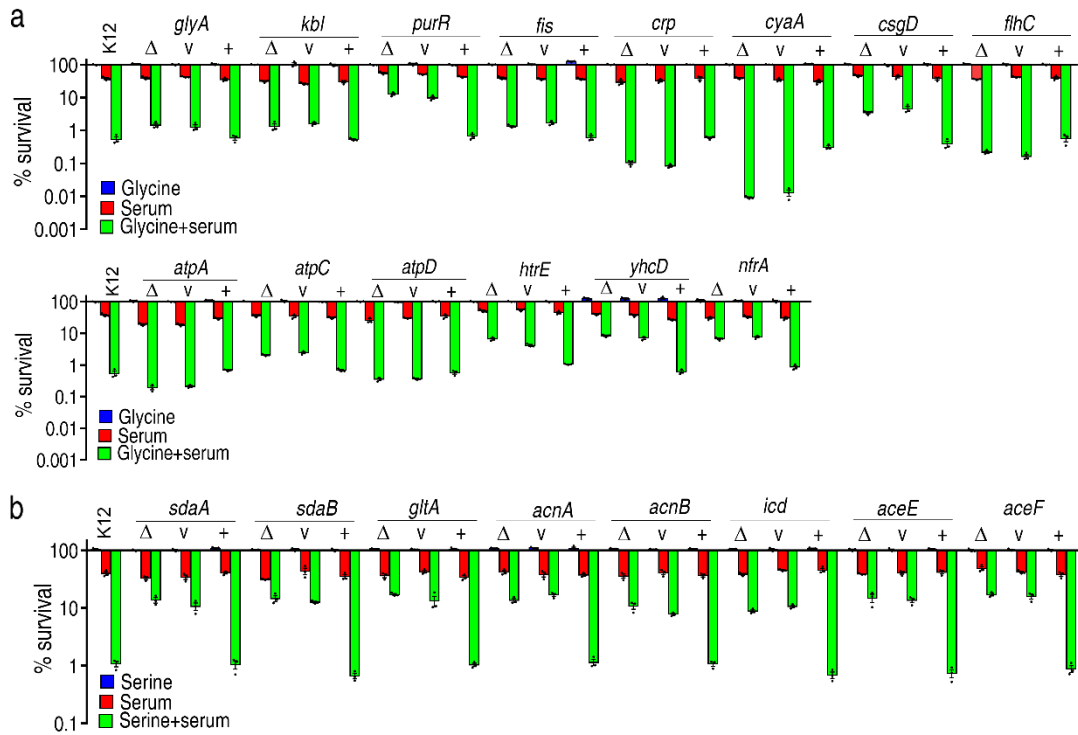

166

167 **Supplementary Fig. 9 Percent survival of gene-complemented strains.** Δ, mutant;

168 V, vector control; +, gene complementation. **a**, 100 μL serum plus 100 mM glycine (*n*

169 = 3). **b**, 100 μL serum plus 50 mM serine (*n* = 3).

170

171

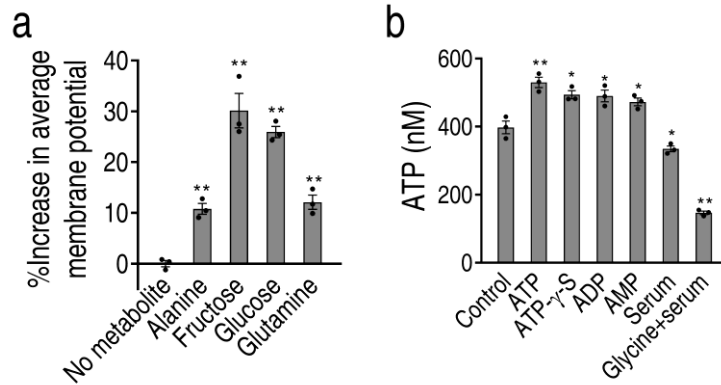

172

173 **Supplementary Fig. 10 Membrane potential and ATP level.** **a**, Percent increased  
 174 membrane potential in the presence of the indicated metabolites (40 mM alanine, 10  
 175 mM fructose, 10 mM glucose, 20 mM glutamine) ( $n = 3$ ). **b**, ATP level of *E. coli* K12  
 176 in the presence of the indicated metabolites or/and serum (2 mM ATP, 2 mM ATP- $\gamma$ -S,  
 177 2 mM ADP, 2 mM AMP; 100  $\mu$ L serum, 100 mM glycine) ( $n = 3$ ). Results are  
 178 displayed as mean  $\pm$  SEM, and significant differences are identified (\*  $p < 0.05$ ; \*\*  $p$   
 179  $< 0.01$ ) as determined by two-tailed Student's *t* test.

180

181

182

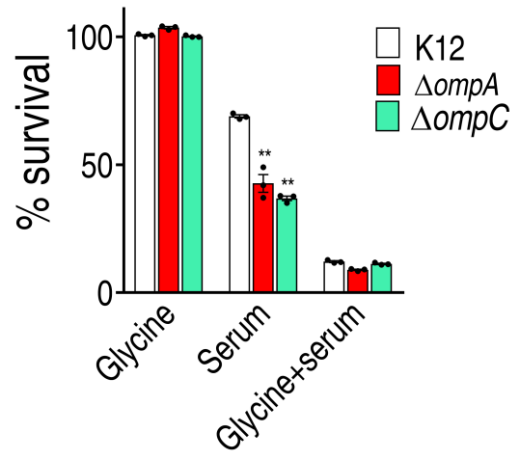

183

184 **Supplementary Fig. 11 Effect of loss of *ompA*, *ompC* on survival.** Percent survival  
185 of *ompA*-, *ompC*-deficient mutants in the presence of 100 mM glycine, 100  $\mu$ L serum  
186 or both ( $n = 3$ ). To exclude the possibility that downregulation of outer membrane  
187 proteins, including those which are known to interact with complement regulators, e.g.  
188 OmpA and OmpC, by exogenous glycine would also increase serum susceptibility, we  
189 detected percent survival of *ompA*- and *ompC*-deleted mutants, and found that loss of  
190 *ompA* and *ompC* led to lower percent survival in the presence of serum but not in the  
191 presence of serum and glycine. Results are displayed as mean  $\pm$  SEM, and significant  
192 differences are identified (\*\*  $p < 0.01$ ) as determined by two-tailed Student's  $t$  test.

193



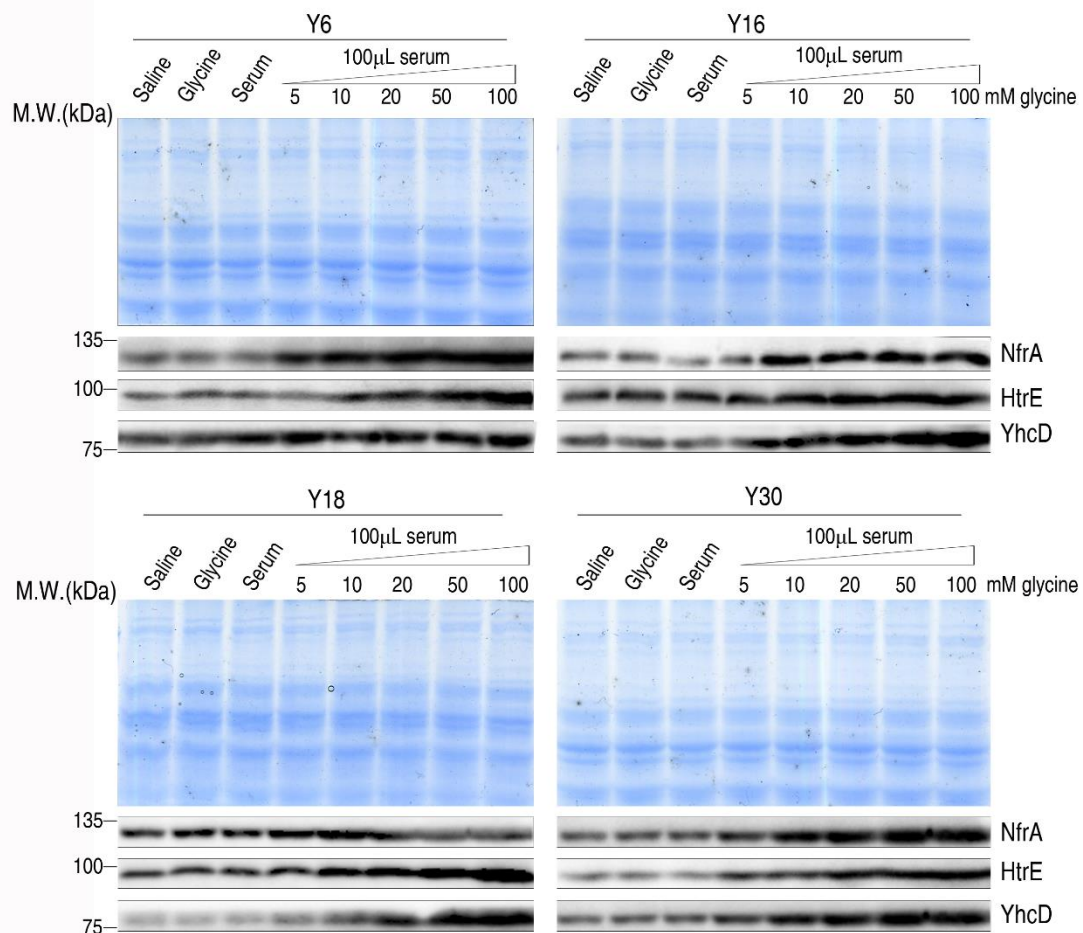

194

195 **Supplementary Fig. 12 Regulation of NfrA, HtrE and YhcD expression.** NfrA,  
 196 HtrE and YhcD expression induced by increasing concentrations of glycine plus  
 197 serum in clinically isolated *E. coli* strains Y6, Y16, Y18, and Y30.

198

199

200

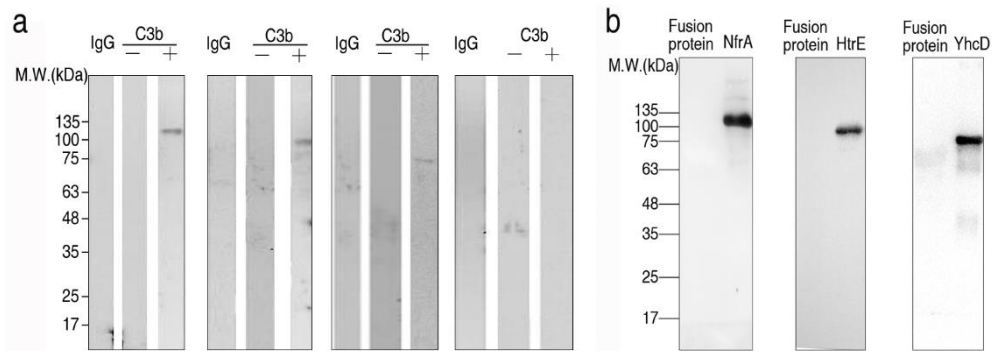

201

202 **Supplementary Fig. 13 Interaction of C3 with HtrE, NfrA, and YhcD.**

203 Far-Western blot and Co-immunoprecipitation (Co-IP) were used for the interaction

204 of C3 with HtrE, NfrA, and YhcD. **a**, Far-Western blot analysis of HtrE, NfrA, and

205 YhcD interacting with complement C3 or IgG. **b**, Co-IP of HtrE, NfrA and YhcD with

206 complement C3. Beads coupled with C3b antibody were incubated with a human

207 serum to capture C3b as a bait protein. The bait protein was reacted with recombinant

208 proteins NfrA, HtrE, and YhcD; blots were probed with anti- HtrE, -NfrA and -YhcD.

209

210

a

*E. coli*    *P. aeruginosa*    *K. pneumoniae*

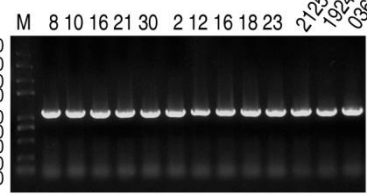

b

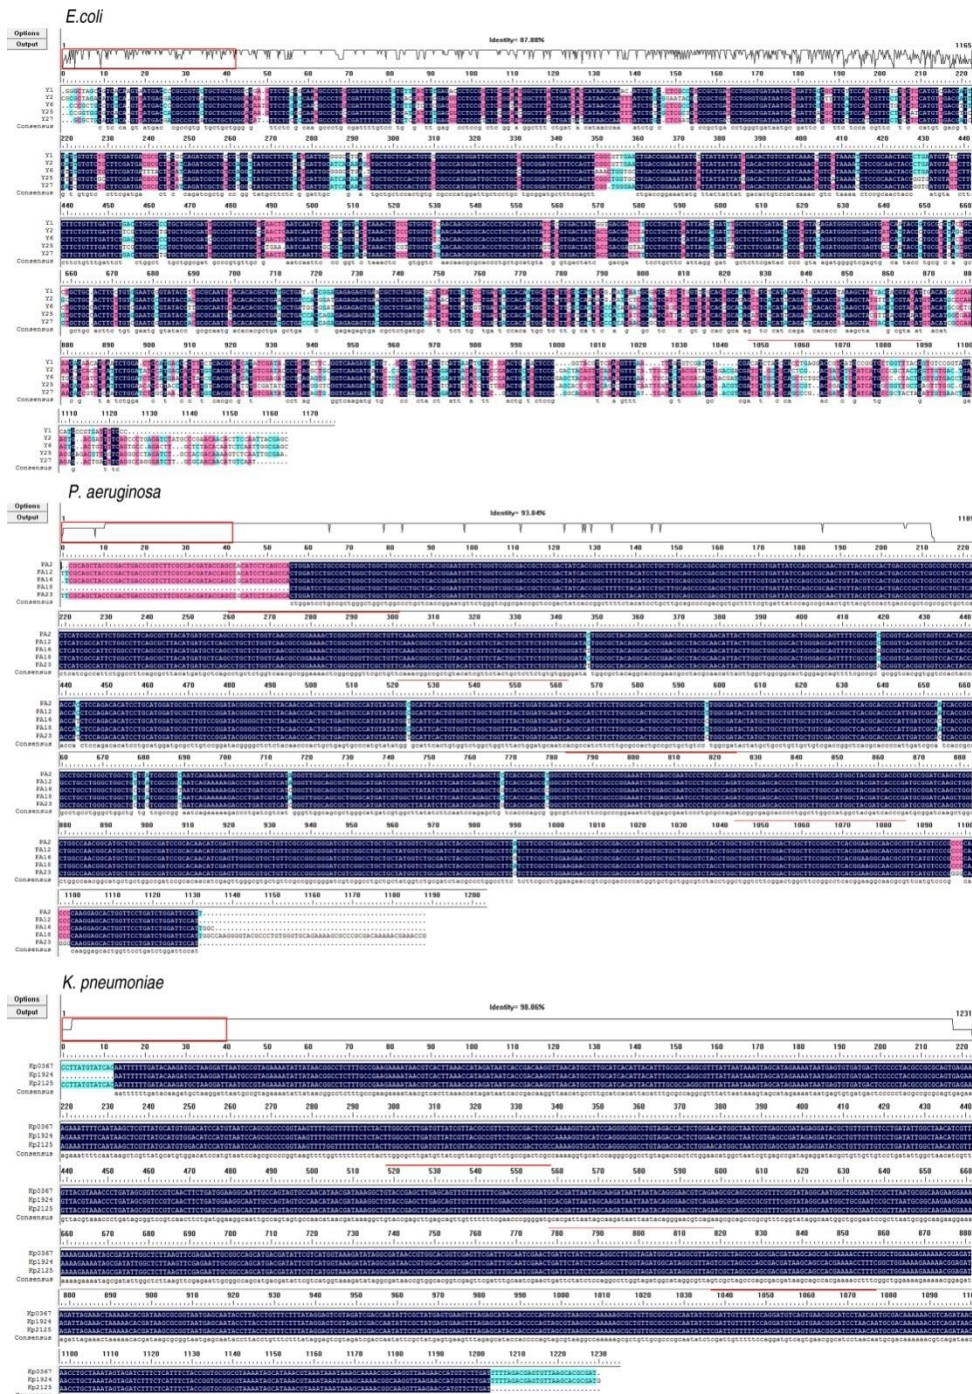

213

214

215

**Supplementary Fig. 14 PCR and sequencing of *waal*. PCR (a) and sequencing (b) of *waal* in *E. coli*, *P. aeruginosa*, and *K. pneumoniae* strains.**

216  
217  
218  
219

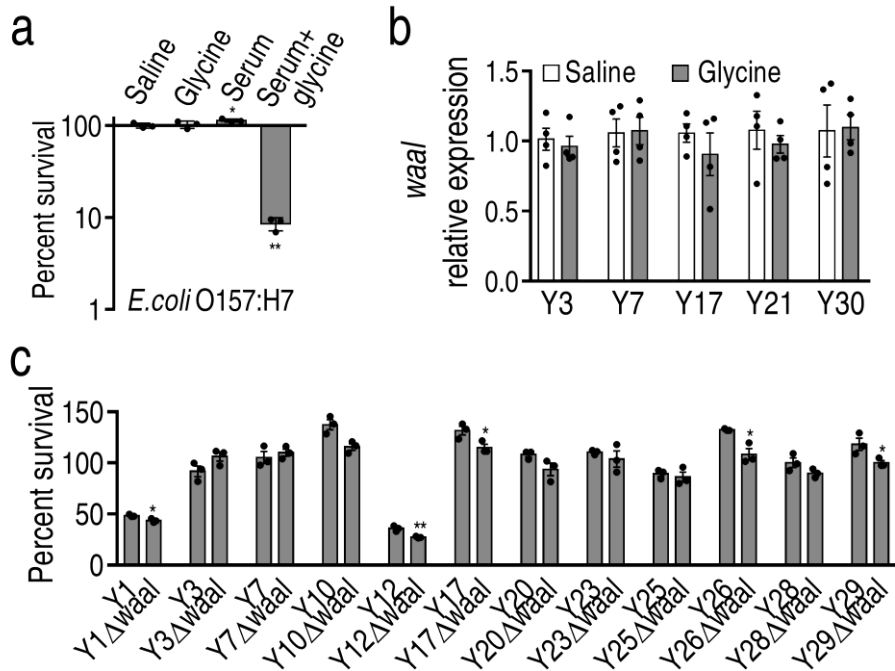

220  
221  
222  
223  
224  
225  
226  
227  
228  
229  
230

**Supplementary Fig. 15 Effect of O-antigens on glycine-mediated serum killing.** **a**, Percent survival of *E. coli* O157:H7 with or without 100  $\mu$ L serum or 100 mM glycine or both ( $n = 3$ ). **b**, qRT-PCR for detection of *waal* expression in the presence or absence of 100 mM glycine ( $n = 4$ ). **c**, Percent survival of the indicated *E. coli* strains and their *waal*-deleted mutants in the presence of 100  $\mu$ L serum ( $n = 3$ ). Results are displayed as mean  $\pm$  SEM, and significant differences are identified (\* $p < 0.05$ , \*\* $p < 0.01$ ) as determined by two-tailed Student's *t* test.

231  
232

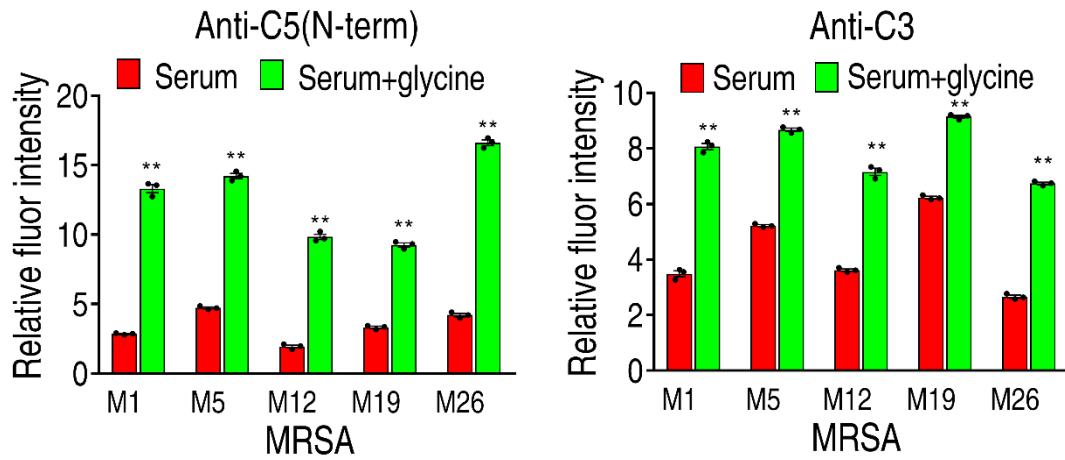

233  
234  
235  
236  
237  
238  
239  
240

**Supplementary Fig. 16 Quantification of C3 and C5 on MRSA membrane.** Flow cytometry quantification of C3 and C5 on the membrane surface of the indicated MRSA strains ( $n = 3$ ). Results are displayed as mean  $\pm$  SEM, and significant differences are identified (\* $p < 0.05$ , \*\* $p < 0.01$ ) as determined by two-tailed Student's  $t$  test.

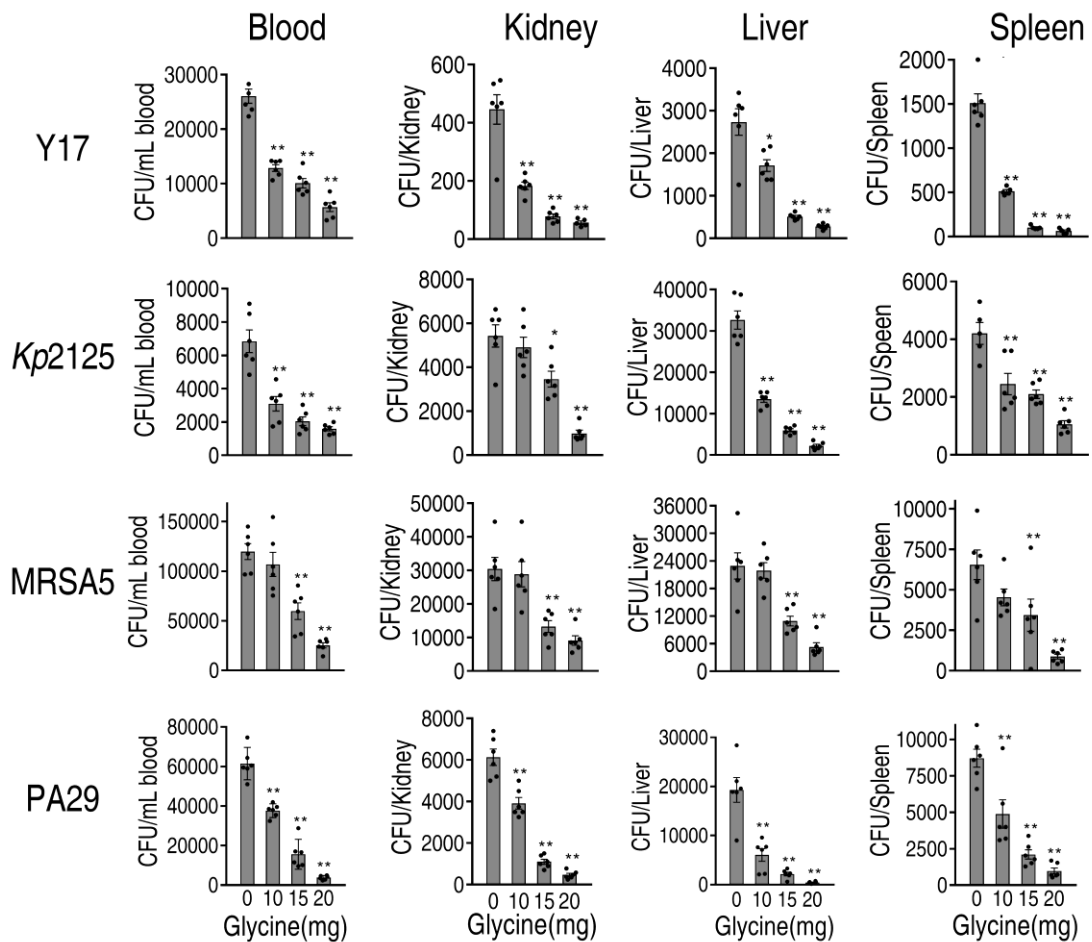

242

243

**Supplementary Fig. 17 The glycine-enabled killing of clinical strains *in vivo*.** The glycine-enabled killing of clinical strains was performed in BALB/c mouse model of bacteremia. Mice were infected by *i. p.* injection (see methods) and treated with glycine as described (see text) ( $n = 6$ ). Results are displayed as mean  $\pm$  SEM, and significant differences are identified (\* $p < 0.05$ , \*\* $p < 0.01$ ) as determined by two-tailed Student's *t* test.

249

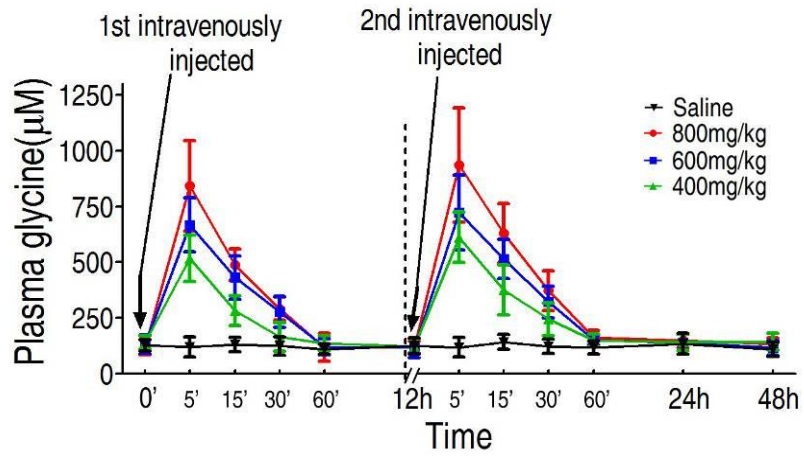

250

251 **Supplementary Fig. 18 UPLC/MS quantification of plasma glycine.** A total of two  
 252 injections were given, where the second injection was performed 12 h after the first  
 253 injection ( $n = 10$ ).

254

255

256

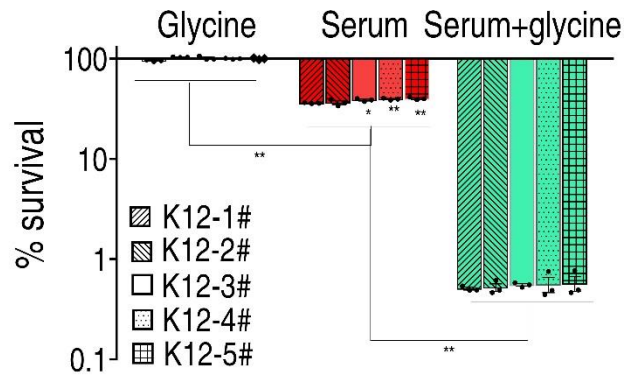

257

258 **Supplementary Fig. 19 Effect of five round serum killing on survival.** Percent  
259 survival of *E. coli* K12 recovered from serum killing in the presence of glycine, serum  
260 or serum plus glycine ( $n = 3$ ). Results are displayed as mean  $\pm$  SEM, and significant  
261 differences are identified (\* $p < 0.05$ , \*\* $p < 0.01$ ) as determined by two-tailed  
262 Student's *t* test.

263

264



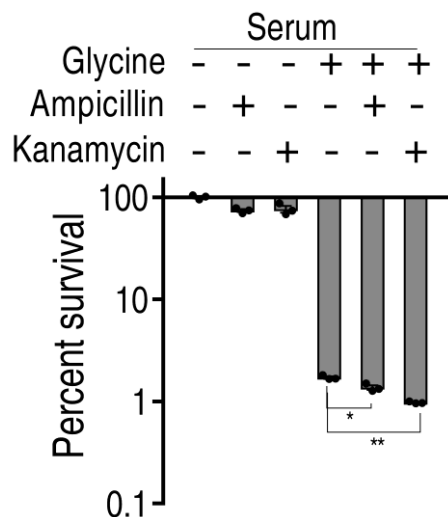

265

266 **Supplementary Fig. 20 Glycine promotes antibiotics-mediated killing.** Percent  
 267 survival of *E. coli* in M9 and in the presence or absence of the indicated metabolites  
 268 or/and antibiotics plus serum ( $n = 3$ ). Results are displayed as mean  $\pm$  SEM, and  
 269 significant differences are identified ( $*p < 0.05$ ,  $**p < 0.01$ ) as determined by  
 270 two-tailed Student's *t* test. Compared with Supplementary 5c, this result suggests  
 271 ampicillin and gentamicin-mediated killing is related to environments.

272

273

274

275 **Supplementary Tables**

276 **Supplementary Tab. 1 Summary of all compounds which have been detected as**  
277 **labeled by the[U-<sup>13</sup>C] glycine**

278

| RT    | Name      | Glycine( <sup>13</sup> C) fragments |
|-------|-----------|-------------------------------------|
| 8.51  | Glycine   | 1                                   |
| 12.63 |           | 1                                   |
| 12.87 | Succinate | 3                                   |
| 13.82 | Fumarate  | 2                                   |
| 14.45 |           | 1                                   |
| 14.05 | Serine    | 1                                   |
| 14.70 | Threonine | 1                                   |
| 15.99 |           | 1                                   |
| 17.27 | Malate    | 3                                   |
| 17.40 |           | 2                                   |
| 17.47 |           | 2                                   |
| 24.66 | Citrate   | 3                                   |
| 24.98 |           | 1                                   |
| 25.59 |           | 2                                   |

279

280

281

282

**Supplementary Tab. 2 Summary of all compounds which have been detected as labeled by the[U-<sup>13</sup>C] glycine**

| RT    | Name      | Frag | R <sup>2</sup> | M0       |          | M1       |          | M2       |          | M3       |          | M4       |          | M5       |          | M6       |          |
|-------|-----------|------|----------------|----------|----------|----------|----------|----------|----------|----------|----------|----------|----------|----------|----------|----------|----------|
|       |           |      |                | %        | SD       | %        | SD       | %        | SD       | %        | SD       | %        | SD       | %        | SD       | %        | SD       |
| 12.63 | Glycine   | 248  | 1              | 57.6348  | 4.6702   | 1.2722   | 0.1420   | 41.0930  | 4.5506   |          |          |          |          |          |          |          |          |
| 14.69 | Threonine | 73   | 1              | 51.0989  | 1.32204  | 5.48509  | 0.217    | 34.8729  | 1.27231  | 3.24037  | 0.30072  | 5.3027   | 0.38699  |          |          |          |          |
|       |           | 219  | 0.99           | 71.1429  | 1.33104  | 18.5393  | 1.3153   | 8.38118  | 0.75786  | 1.55078  | 0.50995  | 0.38587  | 0.1849   |          |          |          |          |
| 14.05 | Serine    | 73   | 1              | 56.1061  | 2.28012  | 6.11031  | 0.4121   | 34.7337  | 2.36329  | 3.04987  | 0.44212  |          |          |          |          |          |          |
|       |           | 204  | 1              | 62.7696  | 3.45678  | 20.5192  | 1.5173   | 8.91253  | 0.99291  | 7.7987   | 1.57336  |          |          |          |          |          |          |
| 24.66 | Citrate   | 273  | 0.99           | 64.70363 | 0.803664 | 21.11298 | 1.005435 | 9.69548  | 0.578886 | 3.466182 | 0.394317 | 1.021735 | 0.156035 | 0.263781 | 0.131068 | 0.146062 | 0.061967 |
| 12.87 | Succinate | 247  | 1              | 66.69215 | 1.191592 | 19.13368 | 0.351637 | 9.482885 | 0.560201 | 3.710366 | 0.211172 | 0.980925 | 0.10835  |          |          |          |          |
| 13.82 | Fumarate  | 245  | 1              | 78.81966 | 2.348887 | 12.67219 | 1.362162 | 6.126606 | 0.604203 | 1.89176  | 0.29757  | 0.48979  | 0.103915 |          |          |          |          |
| 17.27 | Malate    | 233  | 1              | 72.07981 | 2.268233 | 16.70214 | 1.651779 | 8.036514 | 1.505461 | 2.613666 | 0.76606  | 0.567878 | 0.586713 |          |          |          |          |

**The flux was analyzed in Fig. 3f with supplementary tabs 1 and 2 following as:** <sup>13</sup>C<sub>2</sub>-glycine tracer experiment was carried out in *E. coli* K12 by GC-MS. Since reciprocal transformation occurs between glycine and serine or threonine, higher M2 labeled serine or threonine was detected. The M2 labeled serine was converted to generate M1 labeled acetyl-CoA via pyruvate dehydrogenase. The M1 labeled acetyl-CoA provides an acetyl-group to citrate, succinate, fumarate, malate, and oxaloacetate to produce M1 label in the initial cycle. In the second cycle, the M1 labeled oxaloacetate and M1 labeled acetyl-CoA generate M2 label. In the following cycles, the M2 labeled oxaloacetate with M1 labeled acetyl-CoA produces M3 label, which formed M4 label with M1 labeled acetyl-CoA. Since an equal amount of M1, M2 and M3 were required for generation of M2, M3, and M4, respectively, the relative flux for that metabolite in the TCA cycle ( $v_{TCA}/v_{GLY}$ ) is defined  $(M2 + M3 + M4) / (M1 + M2 + M3)$  ratio, where  $v_{TCA}$  refers to the turnover of a particular metabolite pool and  $v_{GLY}$  refers to the flux of glycine carbon atoms to the TCA cycle.

**Supplementary Tab. 3 O-antigen distribution of clinically isolated strains**

| Strains | O-antigen | Strains | O-antigen | Strains | O-antigen |
|---------|-----------|---------|-----------|---------|-----------|
| Y1      | O55:K59   | Y11     | O29:K?    | Y21     | O142:K86  |
| Y2      | O124:K72  | Y12     | O152:K?   | Y22     | O125:K70  |
| Y3      | O119:K69  | Y13     | O6:K15    | Y23     |           |
| Y4      | O127a:K63 | Y14     |           | Y24     | O144:K?   |
| Y5      |           | Y15     | O119:K69  | Y25     | O112:K66  |
| Y6      | O28:K73   | Y16     | O25:K19   | Y26     | O20:K17   |
| Y7      | O8:K40    | Y17     | O126:K71  | Y27     | O152:K?   |
| Y8      | O143:K?   | Y18     | O9:K9     | Y28     | O128:K67  |
| Y9      | O78:K80   | Y19     | O29:K?    | Y29     | O26:K60   |
| Y10     | O119:K69  | Y20     | O136:K78  | Y30     | O7:K1     |

Note: ? is marked by the Kit, indicating it is not exactly identified.

**Supplementary Tab. 4 Primers for validations of mutants**

| Gene        | Primer sequence (5' to 3')      | bp | Gene        | Primer sequence (5' to 3')       | bp |
|-------------|---------------------------------|----|-------------|----------------------------------|----|
| <i>glyA</i> | F: CTGAATTTTGCAGAAGTGTTAACGC    | 27 | <i>atpA</i> | F: CGTTATCATCCGAGCGGGTGATATG     | 27 |
|             | R: TAATCAGCAGATCGTTATGCCCCGAG   | 27 |             | R: GTGTTCTGGACGCTTGCATCTTAC      | 27 |
| <i>kbl</i>  | F: CCTGAATTTTGCAGAAGTGTTAACG    | 27 | <i>atpC</i> | F: AATACGATCACCTGCCGGAGCAGGC     | 27 |
|             | R: TCAGCAGATCGTTATGCCCCGAGTTC   | 27 |             | R: ATATCAGCAGGATCTATGTGAACGC     | 27 |
| <i>purR</i> | F: TTTACCACTTCCCCTTTTCGTCAAGA   | 25 | <i>atpD</i> | F: TATAACAACAAAGCTCGTCAGGCCAG    | 27 |
|             | R: GGAGAATTCGGTGCCAAACCGCTT     | 25 |             | R: GTTACCTGGATTTTCTCGACCAGAC     | 27 |
| <i>purD</i> | F: GTGAAAGGTTCTCGATGGCTTCTGA    | 25 | <i>sdaA</i> | F: TTCATGTGAATAGTTAAGCCAGTCG     | 27 |
|             | R: GTCGAGCGCAAGCCTTTATATAAG     | 25 |             | R: ACGCTGACGCAACAGTGGAAGTGT      | 27 |
| <i>nfrA</i> | F: CGCGTCCTGACAATTCAACGCGAATTAC | 30 | <i>aceE</i> | F: GCAACTAAACGTAGAACCTGTCTTATTG  | 30 |
|             | R: GACTATCTCGGTTTTGTGGTTGCCAGAT | 30 |             | R: TCAACTTTGTGCGCCACTTTGACCAGG   | 29 |
| <i>htrE</i> | F: AGTGCATTTTACGCCATTAATGAC     | 27 | <i>aceF</i> | F: TGGCGAAATCGATAAGAAAGTGGTTGC   | 29 |
|             | R: ATATCCGTTGCAAATACTGAGGGTG    | 27 |             | R: CAAACGGCAACCGATTTGTCTATTTCG   | 29 |
| <i>yhcD</i> | F: TACGGATACAAAAGTCGAGTTTTTAC   | 27 | <i>gltA</i> | F: AGCGGCGAGCCAAATAAAAAACGGG     | 27 |
|             | R: CCATAGTCGATATTTTGTATGCTAC    | 27 |             | R: AATCAACCCGCCATATGAACGGCGG     | 27 |
| <i>csuD</i> | F: TTAACACACAGCAGTCAACATC       | 27 | <i>acnA</i> | F: ATTTGGGTTGTTATCAAATCGTTACGCG  | 30 |
|             | R: AGTTAGCAATCCCGGGACTTCTACC    | 27 |             | R: CAAAGCCGAGAAAATGGGCCATTTGCTG  | 30 |
| <i>flhC</i> | F: ACGATCTCCAGCAAATTCATACCGG    | 27 | <i>acnB</i> | F: CCGTTGCGGTACTGGGCATTTACCCTAC  | 30 |
|             | R: GACAGGATGTTTCAGTCGTCAGGCGT   | 27 |             | R: GAAAAACAGCGGAACGGCGATGGTTTAG  | 30 |
| <i>crp</i>  | F: TGATAGCCCCTTCCCAGGTAGCGGG    | 27 | <i>icd</i>  | F: TCTAAAGCATCCGTATCGCAGGACG     | 27 |
|             | R: TGTCGAAGTGCATAGTTGATATCGG    | 27 |             | R: TTTTGATAACCGTTAGCAGCCTAAC     | 27 |
| <i>fis</i>  | F: CGCACATTCAACGCCATTGAGGATG    | 27 | <i>cyaA</i> | F: CGGTTACCTTTGACATACGAAATATCCCG | 31 |
|             | R: ACATCCTGTTCTCATGGTCACTCCC    | 27 |             | R: CTGGGATTTGCTGGAACAGGCGGCGACGC | 31 |

**Supplementary Tab. 5 Bacterial strains used in the study**

| Strain                         | Original        | Strain                  | Original        | Strain                   | Original        |
|--------------------------------|-----------------|-------------------------|-----------------|--------------------------|-----------------|
| <i>E.coli</i> K12 <sup>1</sup> | KEIO collection | $\Delta$ <i>sdhD</i>    | KEIO collection | $\Delta$ <i>sdaA</i>     | KEIO collection |
| $\Delta$ <i>nfrA</i>           | KEIO collection | $\Delta$ <i>frdA</i>    | KEIO collection | $\Delta$ <i>sdaB</i>     | KEIO collection |
| $\Delta$ <i>htrE</i>           | KEIO collection | $\Delta$ <i>frdB</i>    | KEIO collection | $\Delta$ <i>tdcG</i>     | KEIO collection |
| $\Delta$ <i>yhcD</i>           | KEIO collection | $\Delta$ <i>frdB</i>    | KEIO collection | $\Delta$ <i>trpA</i>     | KEIO collection |
| $\Delta$ <i>purR</i>           | KEIO collection | $\Delta$ <i>frdC</i>    | KEIO collection | $\Delta$ <i>trpB</i>     | KEIO collection |
| $\Delta$ <i>fis</i>            | KEIO collection | $\Delta$ <i>frdD</i>    | KEIO collection | $\Delta$ <i>tynA</i>     | KEIO collection |
| $\Delta$ <i>crp</i>            | KEIO collection | $\Delta$ <i>mdh</i>     | KEIO collection | $\Delta$ <i>aecE</i>     | KEIO collection |
| $\Delta$ <i>cyaA</i>           | KEIO collection | $\Delta$ <i>mgo</i>     | KEIO collection | $\Delta$ <i>aecF</i>     | KEIO collection |
| $\Delta$ <i>flhC</i>           | KEIO collection | $\Delta$ <i>purL</i>    | KEIO collection | $\Delta$ <i>gltA</i>     | KEIO collection |
| $\Delta$ <i>csgD</i>           | KEIO collection | $\Delta$ <i>purK</i>    | KEIO collection | $\Delta$ <i>acnA</i>     | KEIO collection |
| $\Delta$ <i>atpA</i>           | KEIO collection | $\Delta$ <i>purE</i>    | KEIO collection | $\Delta$ <i>acnB</i>     | KEIO collection |
| $\Delta$ <i>atpC</i>           | KEIO collection | $\Delta$ <i>purC</i>    | KEIO collection | $\Delta$ <i>ybhJ</i>     | KEIO collection |
| $\Delta$ <i>atpD</i>           | KEIO collection | $\Delta$ <i>purH</i>    | KEIO collection | $\Delta$ <i>icd</i>      | KEIO collection |
| $\Delta$ <i>glyA</i>           | KEIO collection | $\Delta$ <i>guaA</i>    | KEIO collection | $\Delta$ <i>sucA</i>     | KEIO collection |
| $\Delta$ <i>kbl</i>            | KEIO collection | $\Delta$ <i>guaB</i>    | KEIO collection | $\Delta$ <i>sucB</i>     | KEIO collection |
| $\Delta$ <i>purD</i>           | KEIO collection | $\Delta$ <i>guaC</i>    | KEIO collection | $\Delta$ <i>sucC</i>     | KEIO collection |
| $\Delta$ <i>ltaE</i>           | KEIO collection | $\Delta$ <i>ndk</i>     | KEIO collection | $\Delta$ <i>sucD</i>     | KEIO collection |
| $\Delta$ <i>ilvA</i>           | KEIO collection | $\Delta$ <i>mazG</i>    | KEIO collection | $\Delta$ <i>sdhA</i>     | KEIO collection |
| $\Delta$ <i>tdcB</i>           | KEIO collection | $\Delta$ <i>gsk</i>     | KEIO collection | $\Delta$ <i>sdhB</i>     | KEIO collection |
| $\Delta$ <i>pepA</i>           | KEIO collection | $\Delta$ <i>ushA</i>    | KEIO collection | $\Delta$ <i>sdhC</i>     | KEIO collection |
| $\Delta$ <i>pepB</i>           | KEIO collection | $\Delta$ <i>yibR</i>    | KEIO collection | $\Delta$ <i>pykA</i>     | KEIO collection |
| $\Delta$ <i>pepN</i>           | KEIO collection | $\Delta$ <i>surE</i>    | KEIO collection | $\Delta$ <i>pykF</i>     | KEIO collection |
| $\Delta$ <i>gcvP</i>           | KEIO collection | $\Delta$ <i>yjjG</i>    | KEIO collection | $\Delta$ <i>gshB</i>     | KEIO collection |
| $\Delta$ <i>tdh</i>            | KEIO collection | Y3 $\Delta$ <i>glyA</i> | This study      | Y17 $\Delta$ <i>waal</i> | This study      |

|                                                                         |            |          |                                                                      |          |            |
|-------------------------------------------------------------------------|------------|----------|----------------------------------------------------------------------|----------|------------|
| <i>ΔnfrAΔyhcD</i>                                                       | This study | Y21ΔglyA | This study                                                           | Y20Δwaal | This study |
| <i>ΔhtrEΔyhcD</i>                                                       | This study | Y1Δwaal  | This study                                                           | Y23Δwaal | This study |
| <i>ΔyhcDΔhtrE</i>                                                       | This study | Y3Δwaal  | This study                                                           | Y25Δwaal | This study |
| <i>ΔnfrAΔyhcDΔhtrE</i>                                                  | This study | Y7Δwaal  | This study                                                           | Y26Δwaal | This study |
| <i>ΔhtrEΔyhcDΔnfrA</i>                                                  | This study | Y10Δwaal | This study                                                           | Y28Δwaal | This study |
| <i>ΔyhcDΔhtrEΔnfrA</i>                                                  | This study | Y12Δwaal | This study                                                           | Y29Δwaal | This study |
| <i>Vibrio. alginolyticus</i>                                            |            |          | The collections of our laboratory <sup>2</sup>                       |          |            |
| <i>Vibrio. parahaemolyticus</i>                                         |            |          | The collections of our laboratory                                    |          |            |
| <i>E.coli</i> O157:H7*                                                  |            |          | The collections of our laboratory <sup>3</sup>                       |          |            |
| 30 strains of multidrug-resistant <i>Pseudomonas aeruginosa</i>         |            |          | The collections of our laboratory, which were isolated from patients |          |            |
| 30 strains of methicillin-resistant <i>Staphylococcus aureus</i> (MRSA) |            |          | The collections of our laboratory, which were isolated from patients |          |            |
| 30 strains of multidrug-resistant <i>Klebsiella pneumonia</i>           |            |          | The collections of our laboratory, which were isolated from patients |          |            |
| 30 strains of multidrug-resistant <i>E.coli</i>                         |            |          | The collections of our laboratory, which were isolated from patients |          |            |

<sup>1</sup> Baba T, *et al.* Construction of *Escherichia coli* K-12 in-frame, single-gene knockout mutants: the Keio collection. *Mol Syst Biol.* **2**, 2006.0008 (2006).

<sup>2</sup> Xiong XP, Wang C, Ye MZ, Yang TC, Peng XX, Li H. Differentially expressed outer membrane proteins of *Vibrio alginolyticus* in response to six types of antibiotics. *Mar Biotechnol*, 2010, 12:686-695

<sup>3</sup> Li H, Xiong XP, Peng B, Xu CX, Ye MZ, Yang TC, Wang SY, Peng XX. Identification of broad cross-protective immunogens using heterogeneous antiserum-based immunoproteomic approach. *J Proteome Res.*, 2009, 8, 4342–4349

\*, The bacterium is with adhesive fimbriae and a cell wall that consists of an outer membrane containing LPS,

Supplementary Tab. 6 Primers for construction of mutants

| <b>Primers for amplification of kanamycin cassette (5'-3')</b> |                                                                              |
|----------------------------------------------------------------|------------------------------------------------------------------------------|
| Y3- <i>glyA</i> -KOF                                           | CAGCAAATCACCGTTTCGCTTATGCGTAAACCGGGTAACGTGCG<br>CAGATGATTCCGGGGATCCGTCGACC   |
| Y3- <i>glyA</i> -KOR                                           | TTTATTGTTAGCTGAGTCAGGAGATGCGGATGTTAAAGCGTGAAA<br>TGAAGTGTAGGCTGGAGCTGCTTCG   |
| Y21- <i>glyA</i> -KOF                                          | GGACCGCCTATAAAGGCCAAAAATTTTATTGTTAGCTGAGTCAGG<br>AGATGATTCCGGGGATCCGTCGACC   |
| Y21- <i>glyA</i> -KOR                                          | ACGAGCACATTGTCAGCAAATCACCGTTTCGCTTATGCGTAAACC<br>GGGTATGTAGGCTGGAGCTGCTTCG   |
| ECO- <i>yhcD</i> -KOF                                          | AATAAATATGTCACTGACTTAAAATAACTTTGCCTGGAGCGACAA<br>GGATGATTCCGGGGATCCGTCGACC   |
| ECO- <i>yhcD</i> -KOR                                          | G TTCAGCAGCAGGCATCCTGTTATTATCCGTTTCATTGGCACTCT<br>CCTGT TGTAGGCTGGAGCTGCTTCG |
| ECO- <i>htrE</i> -KOF                                          | TGCCAGGCTGTAATCAGGCAAGGATATAATTCCGCAGGAAGCAT<br>AGCGTGATTCCGGGGATCCGTCGACC   |
| ECO- <i>htrE</i> -KOR                                          | GCGTTGTTTTTATCATTGACGTCCCTTGTAGTACTGAATCTGAC<br>ACCG TGTAGGCTGGAGCTGCTTCG    |
| ECO- <i>nfrA</i> -KOF                                          | CAAAGCAGGTTTAAACACAGAACAGGTTGCGCAACTGGAGTCC<br>GAAAATG ATTCCGGGGATCCGTCGACC  |
| ECO- <i>nfrA</i> -KOR                                          | AGTGTCAGCAATACGAAAATGAACTTACGCATTACCAGTGCAC<br>TCCAAT TGTAGGCTGGAGCTGCTTCG   |
| <i>waal</i> -KOF                                               | ACAGTCAAGCAGTTTTGGAAAAGTTATCATCATTATAAAGGTA AAC<br>ATG ATTCCGGGGATCCGTCGACC  |
| <i>waal</i> -KOR                                               | AGTTTTAACTCACTTCTTAACTTGTTTTATTCTTAATTAATTGTATTGT<br>T TGTAGGCTGGAGCTGCTTCG  |
| <b>Test primers</b>                                            |                                                                              |
| Y3- <i>glyA</i> -F                                             | GCCTCCGGAGATTGCAATATATT                                                      |
| Y3- <i>glyA</i> -R                                             | GATTC TTTGTAGACCTGTTATCGCA                                                   |
| Y21- <i>glyA</i> -F                                            | CCGGTAGACCTGTTATCGCAC                                                        |
| Y21- <i>glyA</i> -R                                            | ACCGGAGATTGCAATATATTGAA                                                      |
| ECO- <i>yhcD</i> -F                                            | AAAGATGACAAGAGCAGCAGAG                                                       |
| ECO- <i>yhcD</i> -R                                            | GCTTATTCGCACCTTCCCT                                                          |
| ECO- <i>htrE</i> -F                                            | GCACCTCACTGCCTAAAGACA                                                        |
| ECO- <i>htrE</i> -R                                            | CTCGTCTGTGCTCCAGCGTA                                                         |
| ECO- <i>nfrA</i> -F                                            | ATCAGTGGCTCACGGAACAG                                                         |
| ECO- <i>nfrA</i> -R                                            | GTCGTCAATTTCCGCGCT                                                           |
| <i>waal</i> -F                                                 | AGAACGGGCGAAACGACT                                                           |
| <i>waal</i> -R                                                 | ACCGGTTACCGCAAGAT                                                            |



**Supplementary Tab. 7 Primers for gene complementation**

| Gene        | Primer sequence (5' to 3')                           | bp |
|-------------|------------------------------------------------------|----|
| <i>glyA</i> | F: CCAAGCTTATGTTAAAGCGTGAAATGAACATTG                 | 36 |
|             | R: CGCGGATCCTTATGCGTAAACCGGGTAACGTG                  | 34 |
| <i>kbl</i>  | F: CCAAGCTTATGCGTGGAGAATTTTATCAGCAG                  | 35 |
|             | R: CGCGGATCCTCAGGCGATAACGCCAGTTGTTTA                 | 36 |
| <i>nfrA</i> | F: GACAGCTTATCATCGATAAGCTTATGAAGGAGAATAACCTTAATCG    | 48 |
|             | R: GATGCGTCCGGCGTAGAGGATCCTTACCAGTGCCTCCAATGGTGAG    | 49 |
| <i>htrE</i> | F: CCAAGCTTGTGACTATAGAATATACTAAAAATT                 | 36 |
|             | R: CGCGGATCCTTACTGAATCTGACACCGAATTCCA                | 36 |
| <i>yhcD</i> | F: GACAGCTTATCATCGATAAGCTTATGTTAAAAAAACGTTACTGGC     | 48 |
|             | R: GATGCGTCCGGCGTAGAGGATCCTCATTGGCACTCTCCTGTTGC      | 46 |
| <i>csgD</i> | F: GACAGCTTATCATCGATAAGCTTATGTTTAAATGAAGTCCATAGTATTC | 50 |
|             | R: GATGCGTCCGGCGTAGAGGATCCTTATCGCCTGAGGTTATCGTTTG    | 48 |
| <i>flhC</i> | F: CCAAGCTTATGAGTGAAAAAAGCATTGTT                     | 32 |
|             | R: CGCGGATCCTTAAACAGCCTGTACTCTCTG                    | 32 |
| <i>crp</i>  | F: CCAAGCTTATGGTGCTTGGCAAACCGCAAAC                   | 34 |
|             | R: CGCGGATCCTTAAACGAGTGCCGTAAACGACGATG               | 36 |
| <i>fis</i>  | F: CCAAGCTTATGTTTCGAACAACGCGTAAATTC                  | 34 |
|             | R: CGCGGATCCTTAGTTCATGCCGATTTTTTTC                   | 33 |
| <i>atpA</i> | F: CCAAGCTTATGCAACTGAATTCCACCGAAATCA                 | 36 |
|             | R: CGCGGATCCTTACCAGGATTGGGTTGCTTTG                   | 33 |
| <i>atpC</i> | F: CCAAGCTTATGGCAATGACTTACCACCTG                     | 32 |
|             | R: CGCGGATCCTTACATCGCTTTTTTGGTCAAC                   | 33 |
| <i>atpD</i> | F: CCAAGCTTATGGCTACTGGAAAGATTGTC                     | 32 |
|             | R: CGCGGATCCTTAAAGTTTTTGGCTTTTTTCC                   | 33 |
| <i>sdaA</i> | F: CCAAGCTTGTGATTAGTCTATTCGACATG                     | 32 |
|             | R: CGCGGATCCTTAGTCACACTGGACTTTGATTG                  | 34 |
| <i>gltA</i> | F: CCAAGCTTATGGCTGATACAAAAGCAAAC                     | 33 |
|             | R: CGCGGATCCTTAAACGCTTGATATCGCTTTTTAAAG              | 36 |
| <i>acnA</i> | F: GACAGCTTATCATCGATAAGCTTATGTCGTCAACCCTACGAGAAGC    | 48 |
|             | R: GATGCGTCCGGCGTAGAGGATCCTTACTTCAACATATTACGAATGAC   | 49 |
| <i>acnB</i> | F: CCAAGCTTGTGCTAGAAGAATACCGTAAGCACG                 | 36 |
|             | R: CGCGGATCCTTAAACCGCAGTCTGGAAAATCACC                | 36 |
| <i>icd</i>  | F: CCAAGCTTATGGAAAGTAAAGTAGTTGTTT                    | 33 |
|             | R: CGCGGATCCTTACATGTTTTTCGATGATCGCG                  | 33 |
| <i>cyaA</i> | F: GACAGCTTATCATCGATAAGCTTTTGTACCTCTATATTGAGACTC     | 47 |
|             | R: GATGCGTCCGGCGTAGAGGATCCTCACGAAAAATATTGCTGTAATAGC  | 50 |
| <i>purR</i> | F: CCAAGCTTATGGCAACAATAAAAGATGTAG                    | 33 |
|             | R: CGCGGATCCTTAAACGACGATAGTCGCGGAACG                 | 34 |
| <i>aceE</i> | F: GACAGCTTATCATCGATAAGCTTATGTCAGAACGTTTCCCAAATG     | 47 |
|             | R: GATGCGTCCGGCGTAGAGGATCCTTACGCCAGACGCGGGTTAACT     | 47 |

|             |                                                    |    |
|-------------|----------------------------------------------------|----|
| <i>aceF</i> | F: GACAGCTTATCATCGATAAGCTTATGGCTATCGAAATCAAAGTACCG | 49 |
|             | R: GATGCGTCCGGCGTAGAGGATCCTTACATCACCAGACGGCGAATG   | 47 |
| <i>purD</i> | F: CGCGGATCCATGAAAGTATTAGTGATTGG                   | 29 |
|             | R: CCAAGCTTTTAGTTCTGCTCGCGTTCGAT                   | 30 |

**Supplementary Tab. 8 Primers for qRT-PCR**

| Gene        | Primer  | Primer sequence                  | Product size(bp) |
|-------------|---------|----------------------------------|------------------|
| 16S rRNA    | Forward | 5'-ACTGAGACACGGTCCAGACTCCTAC-3'  | 146              |
|             | Reverse | 5'-TTAACGTTTCACACCTTCCTCCCTAC-3' |                  |
| <i>glyA</i> | Forward | 5'-AGCCCGTTTGTGACCTCC-3'         | 91               |
|             | Reverse | 5'-AGCCAGCCAGTTCTTTTCG-3'        |                  |
| <i>kbl</i>  | Forward | 5'-TGAATACTGCGATGTGATGGG-3'      | 146              |
|             | Reverse | 5'-TGGAGAACAGGTACGGACGAG-3'      |                  |
| <i>purD</i> | Forward | 5'-CAAACAGGGCAATCCGAAGG-3'       | 191              |
|             | Reverse | 5'-ATCCACCCGCAGCCATCA-3'         |                  |
| <i>aceE</i> | Forward | 5'-ACCTCTGGACGCACCACCCT-3'       | 181              |
|             | Reverse | 5'-AGTACACGTTCTCCTGCTTCTCA-3'    |                  |
| <i>aceF</i> | Forward | 5'-CAGGGCGGCTGCTTCACTA-3'        | 141              |
|             | Reverse | 5'-CGCAAACCTTTTCCCATTCCA-3'      |                  |
| <i>gltA</i> | Forward | 5'-TGAGCTGGGTATGAATGACGA-3'      | 127              |
|             | Reverse | 5'-CAGTATGATGCCGGAGTAGAAG-3'     |                  |
| <i>sdaA</i> | Forward | 5'-CGGAAATTGGCATGGAAC-3'         | 111              |
|             | Reverse | 5'-CGTTAATCGCCTTCACAGAG-3'       |                  |
| <i>sdaB</i> | Forward | 5'-AGCAAAGAAGAGCTGGAACA-3'       | 85               |
|             | Reverse | 5'-CGCCTTCGGTGGAAATAC-3'         |                  |
| <i>tdcG</i> | Forward | 5'-CGCCATGAGAACGGAATG-3'         | 80               |
|             | Reverse | 5'-CCGCCGACAGAGTAATAGG-3'        |                  |
| <i>acnA</i> | Forward | 5'-ATTGCCCGTGCGGTAGAA-3'         | 189              |
|             | Reverse | 5'-CACTGGTGCTGGTGTGTC-3'         |                  |
| <i>acnB</i> | Forward | 5'-TCCCTGTGCATGGGCAACC-3'        | 194              |
|             | Reverse | 5'-CCCACCTTCGCCATAAACTGC-3'      |                  |
| <i>ybhJ</i> | Forward | 5'-GTGTTTATCAGGGCTTTGTG-3'       | 156              |
|             | Reverse | 5'-TCAGTTCGTCGGTGGTGG-3'         |                  |
| <i>icd</i>  | Forward | 5'-AAACGCCGAGGATATTTACGC-3'      | 126              |
|             | Reverse | 5'-ATGCCGCAGTGCTCAGGGA-3'        |                  |
| <i>sucA</i> | Forward | 5'-ACCTACTGCGGAACCATCGG-3'       | 119              |
|             | Reverse | 5'-TTCTCCTGCGGGCTAAACG-3'        |                  |
| <i>sucB</i> | Forward | 5'-TACGCCGATCATCAACCC-3'         | 169              |
|             | Reverse | 5'-CGTTACCAGGAAGCCAC-3'          |                  |
| <i>sucC</i> | Forward | 5'-GCCGAACAGTGGCTGGGTA-3'        | 89               |
|             | Reverse | 5'-GTCGCTCCCTCCACCAGAAT-3'       |                  |
| <i>sucD</i> | Forward | 5'-TGTGGGTTACATCGCTGGTG-3'       | 87               |
|             | Reverse | 5'-CAGGCTGCGAACGGTTTT-3'         |                  |
| <i>tdcB</i> | Forward | 5'-ACCCGACCATTTCGTGTTAT-3'       | 143              |
|             | Reverse | 5'-GGTGCGTGGTTATTTCTCC-3'        |                  |
| <i>ilvA</i> | Forward | 5'-GCGTATTTGTGCCAGTCGG-3'        | 98               |

|             |         |                               |     |
|-------------|---------|-------------------------------|-----|
|             | Reverse | 5'-CGCTTCTACGGCGATCACTT-3'    |     |
| <i>tdh</i>  | Forward | 5'-AGGTATTTACGGTCGTGAGATG-3'  | 132 |
|             | Reverse | 5'-ATAGCGTCAAAGCCCTTCT-3'     |     |
| <i>ltaE</i> | Forward | 5'-AATGACAGGTGGCGGGATG-3'     | 107 |
|             | Reverse | 5'-AGGCAGCGTTGTTCGTGGTC-3'    |     |
| <i>gshB</i> | Forward | 5'-TGACGGAAAGTGACTGGAAA-3'    | 131 |
|             | Reverse | 5'-AATACAGGTTGGGCTGGTG-3'     |     |
| <i>gcvP</i> | Forward | 5'-GGTGACTTATCCTTCTACCCACG-3' | 86  |
|             | Reverse | 5'-AAACCTGACCGCCGAAGT-3'      |     |
| <i>pepA</i> | Forward | 5'-TGGGTGACGAGTATCAGGAA-3'    | 111 |
|             | Reverse | 5'-GGGTAAAGCGTGACAGGAA-3'     |     |
| <i>pepB</i> | Forward | 5'-TCCTCTGCTGTGCGGATAA-3'     | 110 |
|             | Reverse | 5'-CCCTTCGGCATCAGTGTT-3'      |     |
| <i>pepN</i> | Forward | 5'-TGAGCAACCCGAACCGTAT-3'     | 91  |
|             | Reverse | 5'-AGGTAACCGCTGCCATCTT-3'     |     |
| <i>cycA</i> | Forward | 5'-CGTGGTGATGTTGTATGTGAA-3'   | 142 |
|             | Reverse | 5'-ATGTAGATGAGGACGCTGTTT-3'   |     |
| <i>crp</i>  | Forward | 5'-TTCTGATGCGTTTGTCTGC-3'     | 141 |
|             | Reverse | 5'-GAGTCATAGCGTCTGGTTGTT-3'   |     |
| <i>nfrA</i> | Forward | 5'-CAACATCGTGCGGTAGCCT-3'     | 121 |
|             | Reverse | 5'-TATTGGCAGCAGCAAGCAG-3'     |     |
| <i>htrE</i> | Forward | 5'-GTCTTATACGACGGGCGAAAC-3'   | 94  |
|             | Reverse | 5'-GCTGGCTAAAGTCGGAGGC-3'     |     |
| <i>yhcD</i> | Forward | 5'-CATCGCAGGATACGAAAGA-3'     | 90  |
|             | Reverse | 5'-TGGTTGTTAGCCCAAGTGA-3'     |     |
| <i>flhC</i> | Forward | 5'-CGTGCCTGGACATTGGTGC-3'     | 99  |
|             | Reverse | 5'-AGGCTGGTGAGCGTGGGTA-3'     |     |
| <i>csgD</i> | Forward | 5'-GATCGCTCGTTCGTTGTTC-3'     | 124 |
|             | Reverse | 5'-TCGCCTGAGGTTATCGTTT-3'     |     |
| <i>waal</i> | Forward | 5'-GGATAGTTAGTGGCGTTGC-3'     | 92  |
|             | Reverse | 5'-GGAGTAGGGTTGCTCTGGT-3'     |     |

**Supplementary Tab. 9 Primers for *waal* PCR in different clinical isolated strains**

| Strain               | Forward/<br>Reverse | Primers (5' to 3')    | bp |
|----------------------|---------------------|-----------------------|----|
| <i>E. coli</i>       | <i>waal</i> -F      | GCTTATTGTCACTAATTTTAC | 21 |
|                      | <i>waal</i> -R      | CAGACCTTTCAGTGACCCTG  | 20 |
| <i>K. pneumonia</i>  | <i>waal</i> -F      | GTCACTTAAACCATAGATAA  | 20 |
|                      | <i>waal</i> -R      | ACTCATAGCGAATATTGGTC  | 20 |
| <i>P. aeruginosa</i> | <i>waal</i> -F      | ACACTCGAGCAGCTCCTCAA  | 20 |
|                      | <i>waal</i> -R      | CGGCTGTTTTTCTCCTGATC  | 20 |

## Supplementary Discussion

Notably, other metabolites like alanine, fructose, glucose, and glutamine promote the membrane potential, but they fail to reverse serum resistance. This discrepancy is attributed to the dual roles of glycine that not only promotes membrane potential but also up-regulates the expression of complement-binding outer membrane proteins. The proposed mechanism can be applicable in Gram-negative bacteria with outer membrane proteins in addition to *E. coli*, but why this effect is also observed in Gram-positive bacteria requires further investigation as they do not possess the outer membrane proteins for MAC insertion. The increased deposition of complement components on MRSA surface suggests other mechanisms may exist. Nevertheless, that the triple mutations of *htrE*, *nfrA* and *yhcD* did not completely abrogate glycine-mediated serum killing and loss of *waal* affected the killing potential in several mutants indicates that serum resistance is a multi-factorial event that may include more than membrane potential and outer membrane proteins.

Because complement-dependent killing represents a crucial innate immune response with a rapid but persistent mechanism after bacterial infection<sup>1-3</sup>, glycine potentiation of complement/serum-dependent cell death has a potential clinical use. Most significantly, glycine could be used to potentiate the innate complement response in human patients who lack a strong acquired immune response, such as AIDS patients, or to protect immune-compromised individuals suffering from cystic fibrosis, healthcare-associated pneumonia, and ventilator-associated pneumonia. The mortality

rate from community-acquired bacterial bloodstream infections is as high as 46% in AIDS patients<sup>4,5</sup> and *P. aeruginosa* cause severe respiratory tract and systemic infections<sup>6</sup> and are a major cause of mortality and morbidity in immune-compromised individuals in hospital intensive care units<sup>7</sup>. Equally, the approach is also suitable in animal breeding and aquaculture since the glycine-enabled killing of bacterial pathogens by serum is detected in non-mammalian species, and glycine is used as nutrition for these animals. Finally, exogenous glycine potentiates ampicillin to kill serum-susceptible or serum-resistant and multidrug-resistant pathogens, which may be related to that exogenous glycine fuels the TCA cycle since the inhibited TCA cycle has been determined as a characteristic feature of antibiotic-resistant bacteria<sup>8,9,10-17</sup>. However, further mechanisms wait investigation.

Previous studies showed the role of glycine on cell wall composition and the growth of Gram-positive bacteria<sup>18</sup>. To exclude the possibility that glycine might alter the integrity of the cell wall of Gram-negative bacteria and thereby made bacteria sensitive to serum, antibiotic attack assay was performed. As shown in **(Supplementary Fig. 5c)**, metabolites or antibiotics alone did not kill the bacteria. More importantly, glycine did not increase the efficacy of antibiotics to kill the bacteria in the same buffer as glycine potentiated serum, indicating the unaffected integrity of the cell wall. The synergistic effect of glucose and antibiotics in killing bacteria was served as a positive control, which was shown previously<sup>8,19</sup>. Instead, the present study indicates that glycine promotes the expression of

complement-binding proteins and membrane potential, which enabled the bacteria-killing by serum. In addition, since serum-sensitive bacteria are not necessarily killed by the MAC but by other non-complement heat-sensitive factors<sup>20</sup>, C3-depleted serum and EDTA/EGTA-treated human serum were used to confirm that serum complement system contributes the glycine-enabled killing.

It is clear that multidrug-resistant and serum-resistant pathogens are a serious threat to human health and agriculture<sup>21, 22</sup>. The US Centers for Disease Control and Prevention has recently warned that drug-resistant bacteria kill at least 23,000 people annually in America and cost the US health-care system 20 billion dollars annually<sup>23</sup>. Therefore, it is encouraging that elevation of glycine, serine and threonine catabolic pathway to the TCA cycle potentiates serum-dependent death of multiple strains of Gram-negative and Gram-positive bacteria, via a mechanism that appears to be conserved in humans and other species. We are hopeful that the findings presented in this study will reduce the threat of infection with multidrug-resistant pathogens worldwide and will have broad application in medicine, agriculture and animal husbandry.

To exclude the possibility that downregulation of outer membrane proteins, including those which are known to interact with complement regulators, e.g. OmpA and OmpC, by exogenous glycine would also increase serum susceptibility, we detected percent survival of *ompA*- and *ompC*-deleted mutants, and found that loss of *ompA* and *ompC* led to lower percent survival in the presence of serum but not in the presence of serum



and glycine

In addition, it should be noted that mutants from the KEIO collection may cause phenotypes that are off-targets. And the knockouts may cause a metabolic shift, which is not necessarily related to the observed phenotype, through targeting specific metabolic genes. However, the present study utilizes a large set of mutants as well as other coincided experiments, and thereby ensures the reliability of these findings.

In summary, the present study discloses the regulation of glycine, serine and threonine catabolism to bacterial serum resistance and develops a metabolome-reprogramming strategy to revert serum-resistant metabolome to serum-sensitive metabolome, leading to the elimination of serum resistance. Out of the reprogramming metabolites, glycine and serine are screened. Interestingly, the mechanisms of the regulation not only attribute to metabolic flux, but also depend on substrate activation to enzymes, which lead to disclose of two unknown findings: the GlyA activation caused by high dose of glycine, serine and threonine surpasses over the negative regulation of PurR to *glyA* and *kbl* promoters, and a new metabolic regulation pathway from glycine to ATP synthase. At last, our developed approach highlights the way to control pathogens through reprogramming microbes' sensitivity to host immune defense.

### **Supplementary References**

1. Kolev, M., Kemper, C. Keeping it all going-complement meets metabolism. *Front Immunol.* **8**, 1 (2017).

2. Maruvada, R., Blom, A.M., and Prasadarao, N.V. Effects of complement regulators bound to *Escherichia coli* K1 and Group B Streptococcus on the interaction with host cells. *Immunology* **124**, 265-276 (2008).
3. Wang, C.Y., Wang, S.W., Huang, W.C., Kim, K.S., Chang, N.S., Wang, Y.H., Wu, M.H., & Teng, C.H. Prc contributes to *Escherichia coli* evasion of classical complement-mediated serum killing. *Infect. Immun.* **80**, 3399-3409 (2012).
4. Raffatellu, M., Santos, R.L., Verhoeven, D.E., George, M.D., Wilson, R.P., Winter, S.E., Godinez, I., Sankaran, S., Paixao, T.A., and Gordon, M.A. Simian immunodeficiency virus-induced mucosal interleukin-17 deficiency promotes *Salmonella* dissemination from the gut. *Nat. Med.* **14**, 421-428 (2008).
5. Huson, M.A., Stolp, S.M., van der Poll, T., and Grobusch, M.P. Community-acquired bacterial bloodstream infections in HIV-infected patients: a systematic review. *Clin. Infect. Dis.* **58**, 79-92(2014).
6. Zhang, Y., Li, X., Carpinteiro, A., Goettel, J.A., Soddemann, M., and Gulbins, E. Kinase suppressor of Ras-1 protects against pulmonary *Pseudomonas aeruginosa* infections. *Nat. Med.* **17**, 341-346(2011).
7. Dettman, J.R., Rodrigue, N., Aaron, S.D., and Kassen, R. Evolutionary genomics of epidemic and nonepidemic strains of *Pseudomonas aeruginosa*. *Proc. Natl. Acad. Sci. USA* **110**, 21065 -21070(2013).
8. Peng, B., et al., Exogenous alanine or/and glucose plus kanamycin kills antibiotic-resistant bacteria. *Cell Metab* **21**, 249–261 (2015).
9. Su, Y.B., Peng, B., Han, Y., Li, H., & Peng, X.X. Fructose restores susceptibility of multidrug-resistant *Edwardsiella tarda* to kanamycin. *J Proteome Res* **14**, 1612-1620 (2015).
10. Kohanski, M.A., Dwyer, D.J., Hayete, B., Lawrence, C.A., and Collins, J.J. A common mechanism of cellular death induced by bactericidal antibiotics. *Cell* **130**, 797-810(2007).
11. Kohanski, M.A., Dwyer, D.J., Wierzbowski, J., Cottarel, G., and Collins, J.J. Mistranslation of membrane proteins and two-component system activation trigger antibiotic-mediated cell death. *Cell* **135**, 679-690 (2008).
12. Kohanski, M.A., Dwyer, D.J., and Collins, J.J. How antibiotics kill bacteria: from targets to networks. *Nat. Rev. Microbiol.* **8**, 423-435 (2010).
13. Lin, X.M., Kang, L.Q., Li, H., and Peng, X.X. Fluctuation of multiple metabolic pathways is required for *Escherichia coli* in response to chlortetracycline stress. *Mol. Biosyst.* **10**, 901-908 (2014).
14. Purohit, H.J., Cheem, S., Lal, S., Raut, C.P., Kalia, V.C. In search of drug targets for *Mycobacterium tuberculosis*. *Infect Disord Drug Targets.* **7**, 245-250 (2007).
15. Belenky, P., Ye, J.D., Porter, C.B., Cohen, N.R., Lobritz, M.A., Ferrante, T., Jain, S., Korry, B.J., Schwarz, E.G., Walker, G.C., Collins, J.J. Bactericidal antibiotics induce toxic metabolic perturbations that lead to cellular damage. *Cell Rep.* **13**,

- 968-80 (2015).
16. Liu, S.R., Peng, X.X., Li, H. Metabolic mechanism of ceftazidime resistance in *Vibrio alginolyticus*. *Infect Drug Resist.* **12**, 417-429 (2019).
  17. Cheng, Z.X., Yang, M.J., Peng, B., Peng, X.X., Lin, X.M., Li, H. The depressing central carbon and energy metabolisms mediate levofloxacin resistance in *Vibrio alginolyticus*. *J Proteomics* **181**, 83-91 (2018).
  18. Hammes, W., Schleifer, K.H., & Kandler, O. Mode of action of glycine on the biosynthesis of peptidoglycan. *J Bacteriol.* **116**, 1029-1053(1973).
  19. Allison, K. R., Brynildsen, M. P. & Collins, J. J. Metabolite-enabled eradication of bacterial persisters by aminoglycosides. *Nature* **473**, 216-220 (2011).
  20. Berends, E.T., Mohan, S., Miellet, W.R., Ruyken, M., Rooijackers, S.H. Contribution of the complement membrane attack complex to the bactericidal activity of human serum. *Mol Immunol.* **65**, 328-335 (2015).
  21. Zowawi, H.M., et al. The emerging threat of multidrug-resistant Gram-negative bacteria in urology. *Nat Rev Urol.* **12**, 570-584 (2015).
  22. Tadesse, D.A., Zhao, S., Tong, E., Ayers, S., Singh, A., Bartholomew, M.J., McDermott, P.F. Antimicrobial drug resistance in *Escherichia coli* from humans and food animals, United States, 1950-2002. *Emerg. Infect. Dis.* **18**, 741-749 (2012).
  23. McKenna, M. Antibiotic resistance: the last resort. *Nature* **499**, 394-396 (2013).
